# Supplementary material for: Evidence for the “cocktail” nature of platinum-catalyzed alkyne and alkene hydrosilylation reactions
Source: Royal Society of Chemistry journal article supplement (doi:10.1039/d1cy02006d), 2022-01-01
Supplement: d1cy02006d1.pdf [file d1cy02006d1.pdf]

## Supporting Information

### Evidence for the “cocktail” nature of platinum-catalyzed alkyne and alkene hydrosilylation reactions

Evgeniia E. Ondar, Julia V. Burykina, Valentine P. Ananikov\*

*N.D. Zelinsky Institute of Organic Chemistry, Russian Academy of Sciences, Leninsky Prospect 47,  
Moscow, 119991, Russia*

E-mail: val@ioc.ac.ru; <http://AnanikovLab.ru>

#### Table of contents

|                                                                                                                                 |     |
|---------------------------------------------------------------------------------------------------------------------------------|-----|
| Hydrosilylation reaction conditions .....                                                                                       | S2  |
| Pt <sub>2</sub> dba <sub>3</sub> purity calculation .....                                                                       | S2  |
| Electron microscopy study of the initial catalysts.....                                                                         | S3  |
| Leaching in solvent .....                                                                                                       | S7  |
| ESI-HRMS online monitoring of model reaction .....                                                                              | S11 |
| ESI-HRMS spectra of allyl bromide hydrosilylation reaction mixture.....                                                         | S13 |
| Capture of metal clusters in solution using “nanofishing” procedure.....                                                        | S14 |
| Capture of metal clusters in solution using Fairlamb’s method .....                                                             | S17 |
| Electron microscopy study of the catalysts isolated after the reaction .....                                                    | S18 |
| Electron microscopy study of Pt/MWCNT <sub>THF</sub> and Pt/C catalysts isolated after the reactions with silane variation..... | S21 |
| Platinum nanoparticles size distribution histograms .....                                                                       | S24 |
| Hydrosilylation of tolane in the presence of Pt <sub>2</sub> dba <sub>3</sub> .....                                             | S26 |
| Characterization data .....                                                                                                     | S27 |
| References .....                                                                                                                | S28 |

## Hydrosilylation reaction conditions

**Table S1.** Reaction conditions of hydrosilylation of alkynes.

| Alkyne / Silane    | Phenylacetylene  | 1-Hexyne         | Tolane               | 3-Hexyne         | Trimethylsilyl acetylene |
|--------------------|------------------|------------------|----------------------|------------------|--------------------------|
| HSiCl <sub>3</sub> | 50°C / 5h / neat | 50°C / 5h / neat | 100°C / 9h / toluene | 50°C / 4h / neat | 40°C / 5h / neat         |
| HSiEt <sub>3</sub> | 50°C / 8h / neat | 80°C / 5h / neat | 50°C / 8h / neat     | 80°C / 5h / neat | 70°C / 5h / neat         |
| HSiPh <sub>3</sub> | 70°C / 4h / neat | 70°C / 4h / neat | 90°C / 6h / neat     | 90°C / 8h / neat | 70°C / 4h / neat         |

### Pt<sub>2</sub>dba<sub>3</sub> purity

The purity of the used Pt<sub>2</sub>dba<sub>3</sub>·CHCl<sub>3</sub> complex was determined by a previously described procedure.<sup>1</sup> Calculation of the purity was based on <sup>1</sup>H NMR characterization of the Pt<sub>2</sub>dba<sub>3</sub> complex before catalyst preparation.

## Electron microscopy study of the initial catalysts

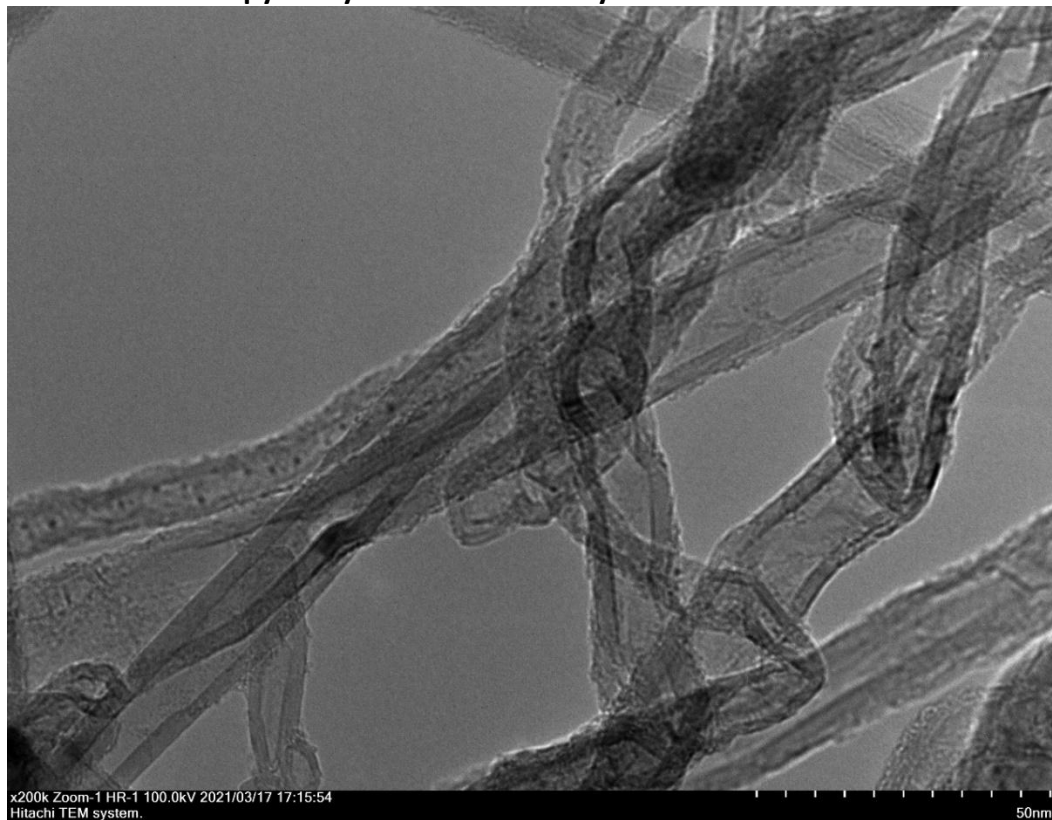

Figure S1. TEM images of initial Pt/MWCNT<sub>chl</sub> catalyst.

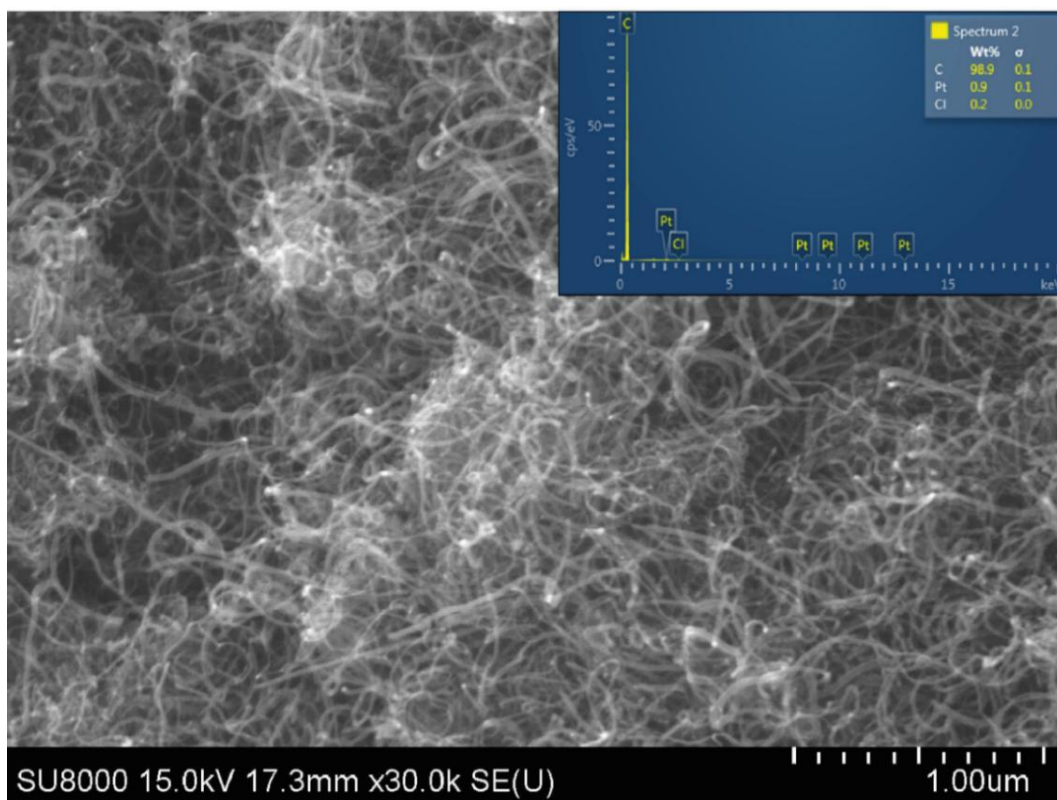

Figure S2. SEM/EDX of initial Pt/MWCNT<sub>chl</sub> catalyst.

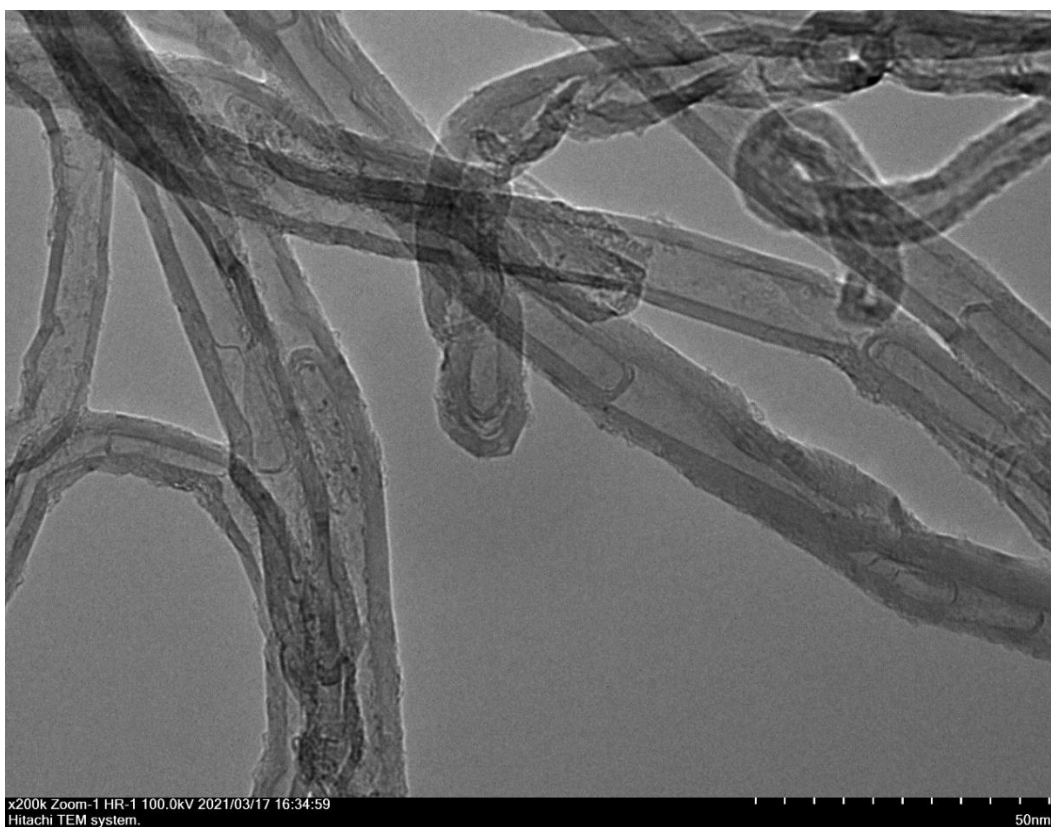

Figure S3. TEM images of initial Pt/MWCNT<sub>THF</sub> catalyst.

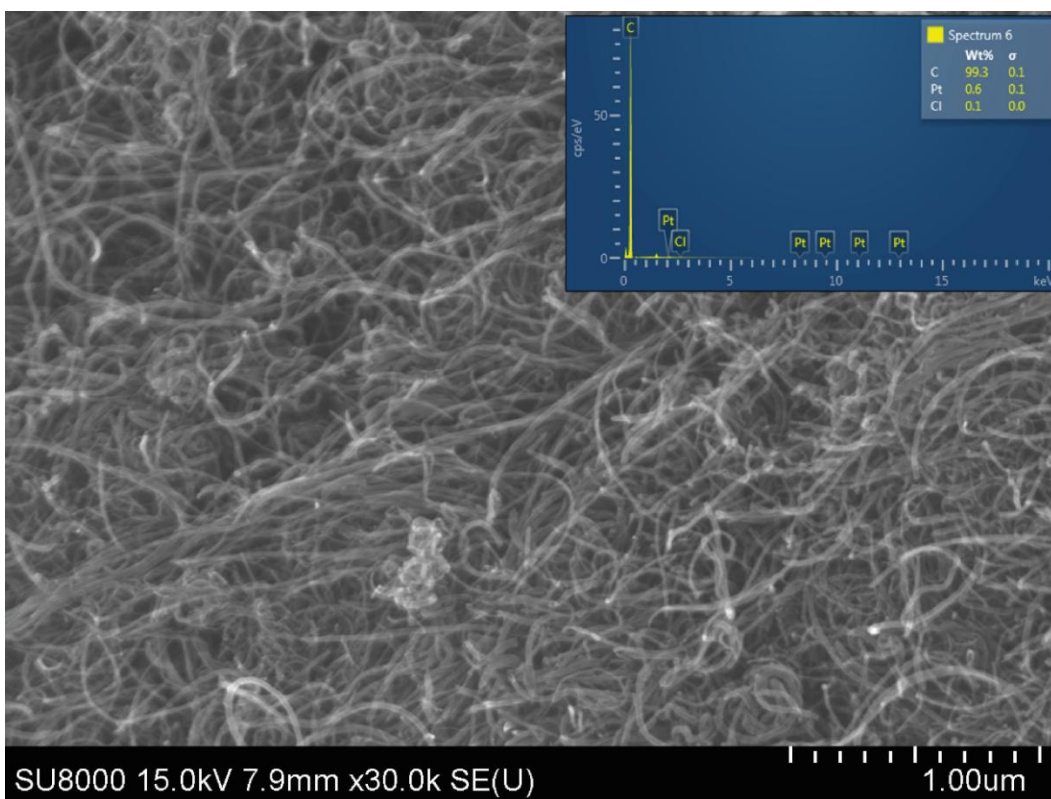

Figure S4. SEM/EDX of initial Pt/MWCNT<sub>THF</sub> catalyst.

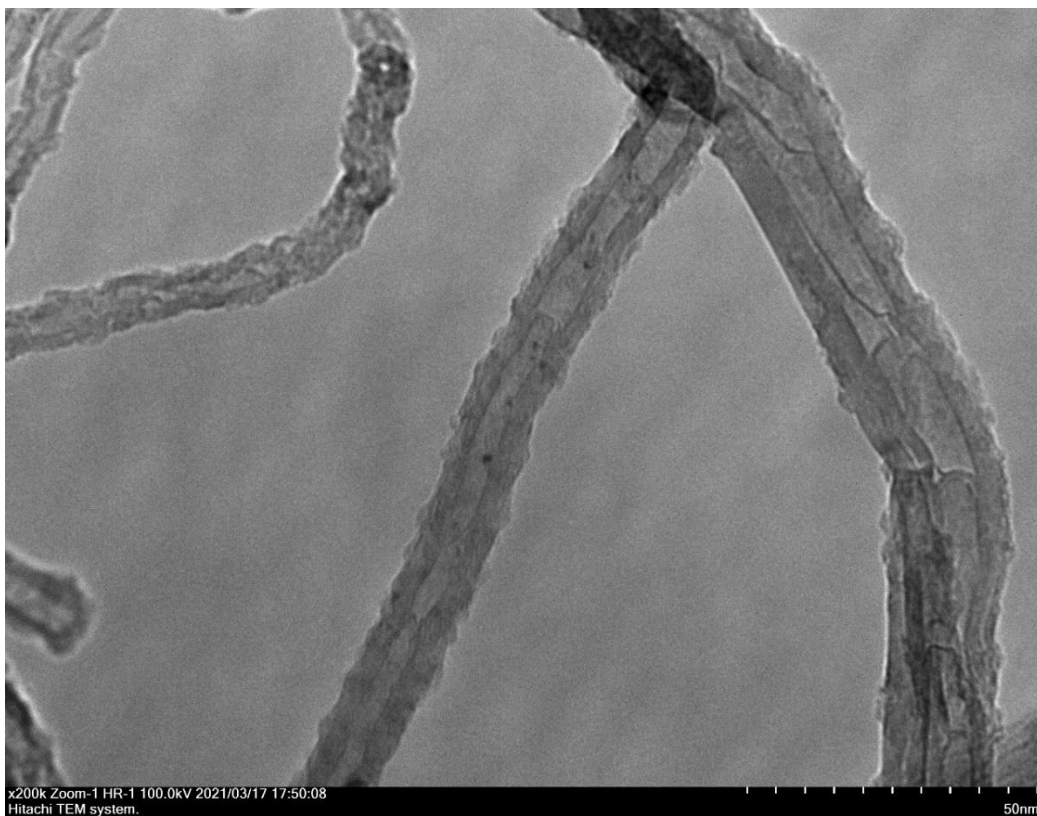

Figure S5. TEM images of initial Pt/MWCNT<sub>tol</sub> catalyst.

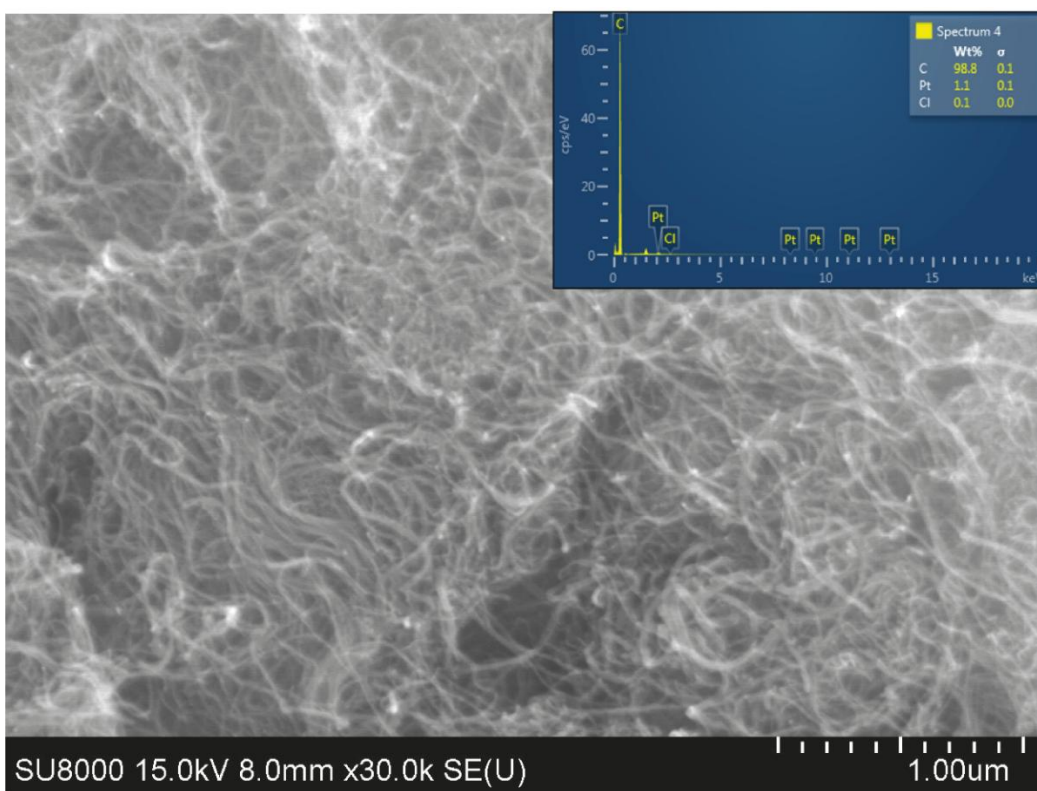

Figure S6. SEM/EDX of initial Pt/MWCNT<sub>tol</sub> catalyst.

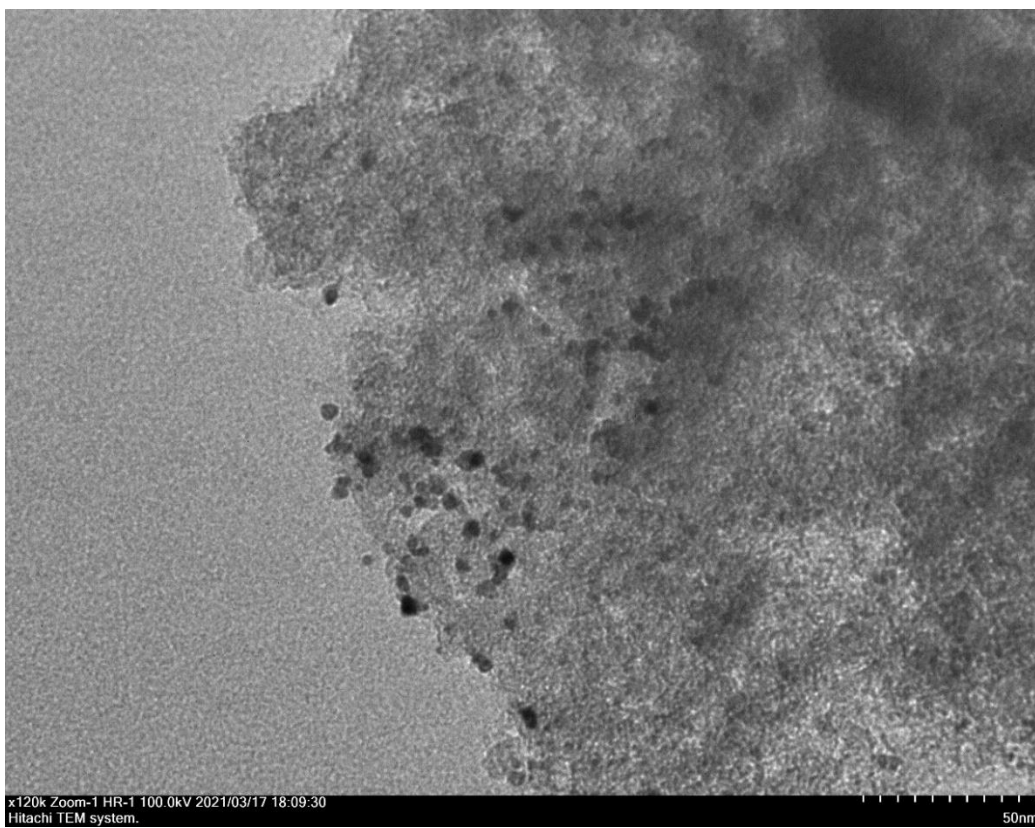

**Figure S7.** TEM images of initial Pt/C catalyst.

## Leaching in solvent

0.3 wt. % Pt/MWCNT<sub>chl</sub>, Pt/MWCNT<sub>THF</sub>, Pt/MWCNT<sub>tol</sub> and commercial 1 wt. % Pt/C were refluxed for 1 h in THF and analyzed by ESI-HRMS and TEM. Two points were taken into consideration – initial and 1 h points.

**Table S2.** ESI-HRMS leaching study of Pt/MWCNT<sub>chl</sub>, Pt/MWCNT<sub>THF</sub>, Pt/MWCNT<sub>tol</sub> catalysts.<sup>a</sup>

| Entry | Time point | Pt/C | Pt/MWCNT <sub>chl</sub>                                                                                                                                                                                   | Pt/MWCNT <sub>THF</sub>                                                                                                    | Pt/MWCNT <sub>tol</sub>                                                                                                                                                                                        |
|-------|------------|------|-----------------------------------------------------------------------------------------------------------------------------------------------------------------------------------------------------------|----------------------------------------------------------------------------------------------------------------------------|----------------------------------------------------------------------------------------------------------------------------------------------------------------------------------------------------------------|
| 1     | initial    | -    | [PtCl <sub>3</sub> (dba)(N <sub>2</sub> ) <sub>2</sub> ] <sup>-</sup>                                                                                                                                     | -                                                                                                                          | -                                                                                                                                                                                                              |
| 2     | 1 hour     | -    | [PtCl <sub>3</sub> ] <sup>-</sup><br>[PtCl <sub>2</sub> NO <sub>2</sub> ] <sup>-</sup><br>[PtCl <sub>3</sub> (dba)(N <sub>2</sub> ) <sub>2</sub> ] <sup>-</sup><br>[PtCl <sub>3</sub> (dba)] <sup>-</sup> | [PtCl <sub>2</sub> NO <sub>2</sub> ] <sup>-</sup><br>[PtCl <sub>3</sub> (dba)(N <sub>2</sub> ) <sub>2</sub> ] <sup>-</sup> | [PtCl <sub>3</sub> ] <sup>-</sup><br>[PtCl <sub>3</sub> (dba)NO <sub>2</sub> ] <sup>-</sup><br>[PtCl <sub>3</sub> (dba)(N <sub>2</sub> ) <sub>2</sub> ] <sup>-</sup><br>[PtCl <sub>3</sub> (dba)] <sup>-</sup> |

<sup>a</sup> ESI-HRMS study of Pt molecular complexes present in the solution at the beginning of the experiment and after 1 h, respectively.

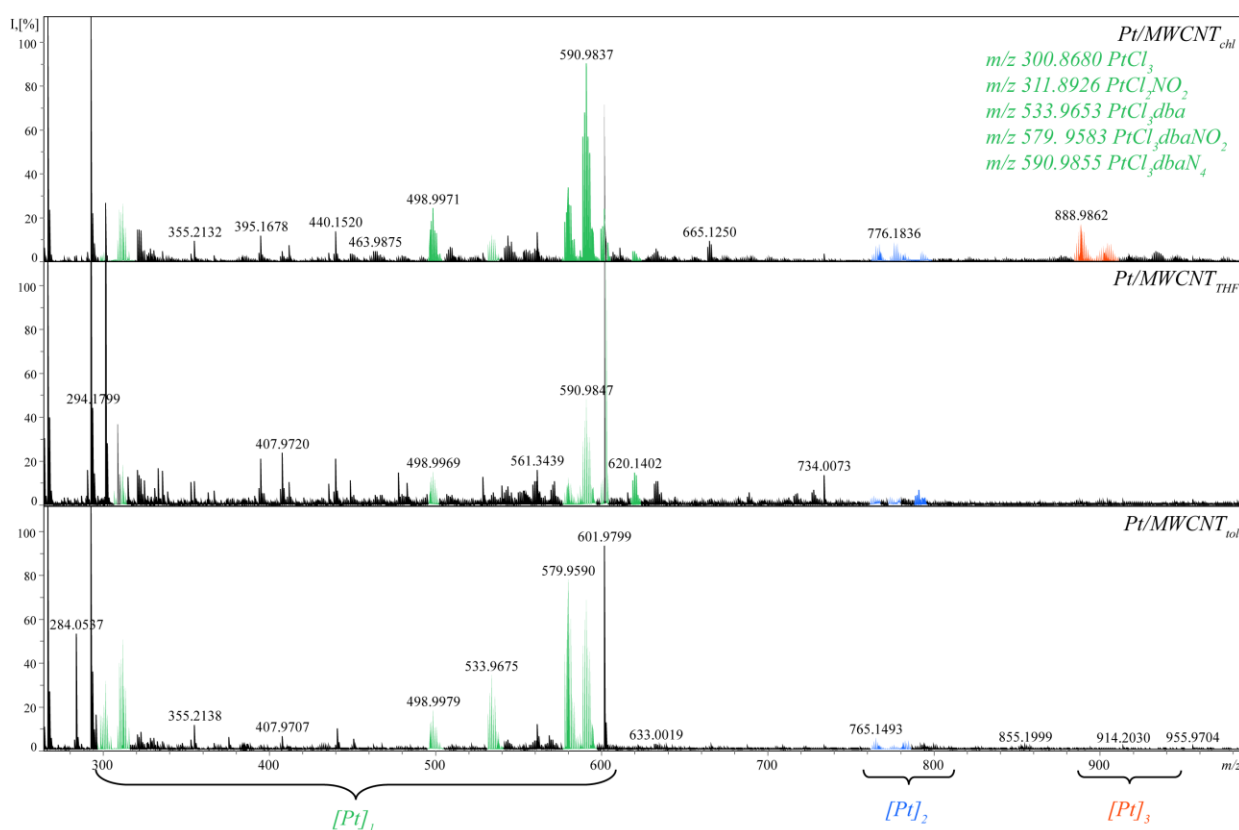

**Figure. S8.** ESI-HRMS spectra of Pt/MWCNT<sub>chl</sub>, Pt/MWCNT<sub>THF</sub>, Pt/MWCNT<sub>tol</sub> in THF after 1 h of reflux. Complexes with one platinum atom are colored green, with two Pt atoms in blue and three atoms in orange.

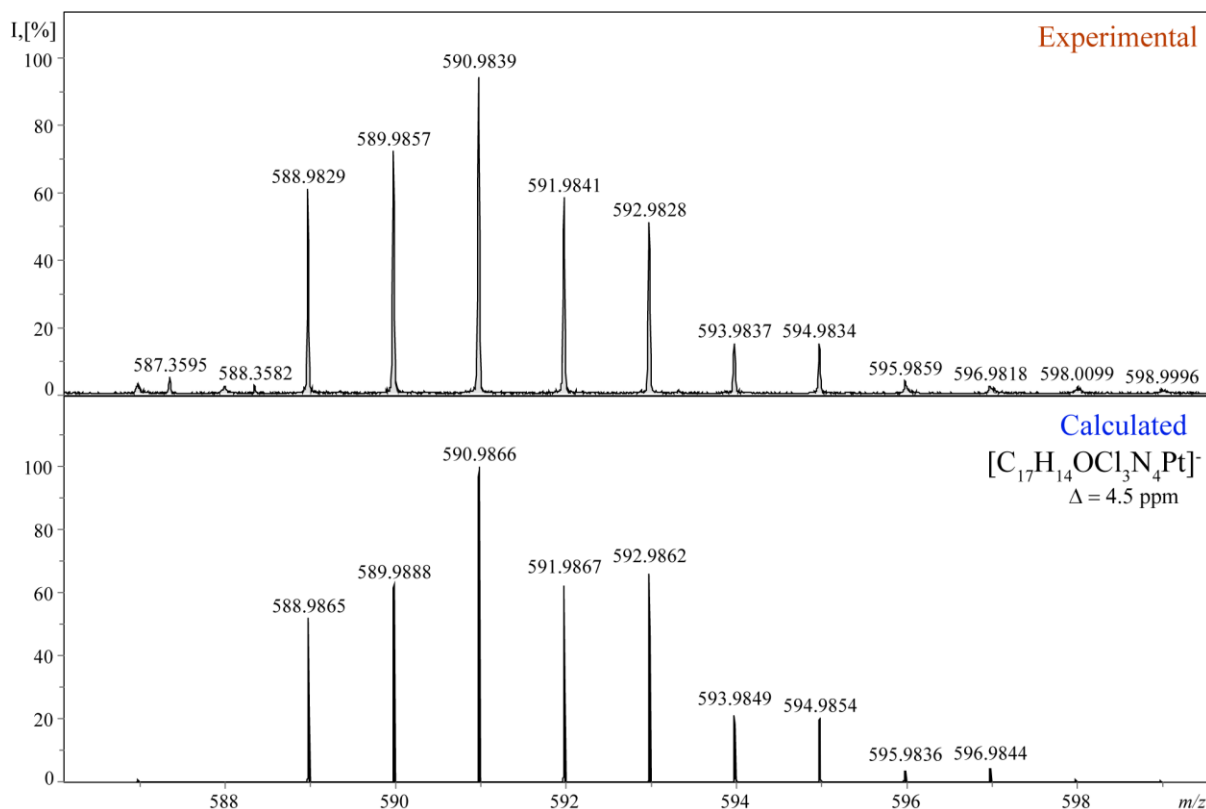

**Figure S9.** Experimentally detected and theoretical ESI(-)HRMS spectrum of Pt/MWCNT<sub>chl</sub>/THF/1h; main experimental peak  $[M]^- = 590.9839$  Da, calculated for  $[C_{17}H_{14}OCl_3N_4Pt]^- = 590.9866$  Da,  $\Delta = 4.5$  ppm.

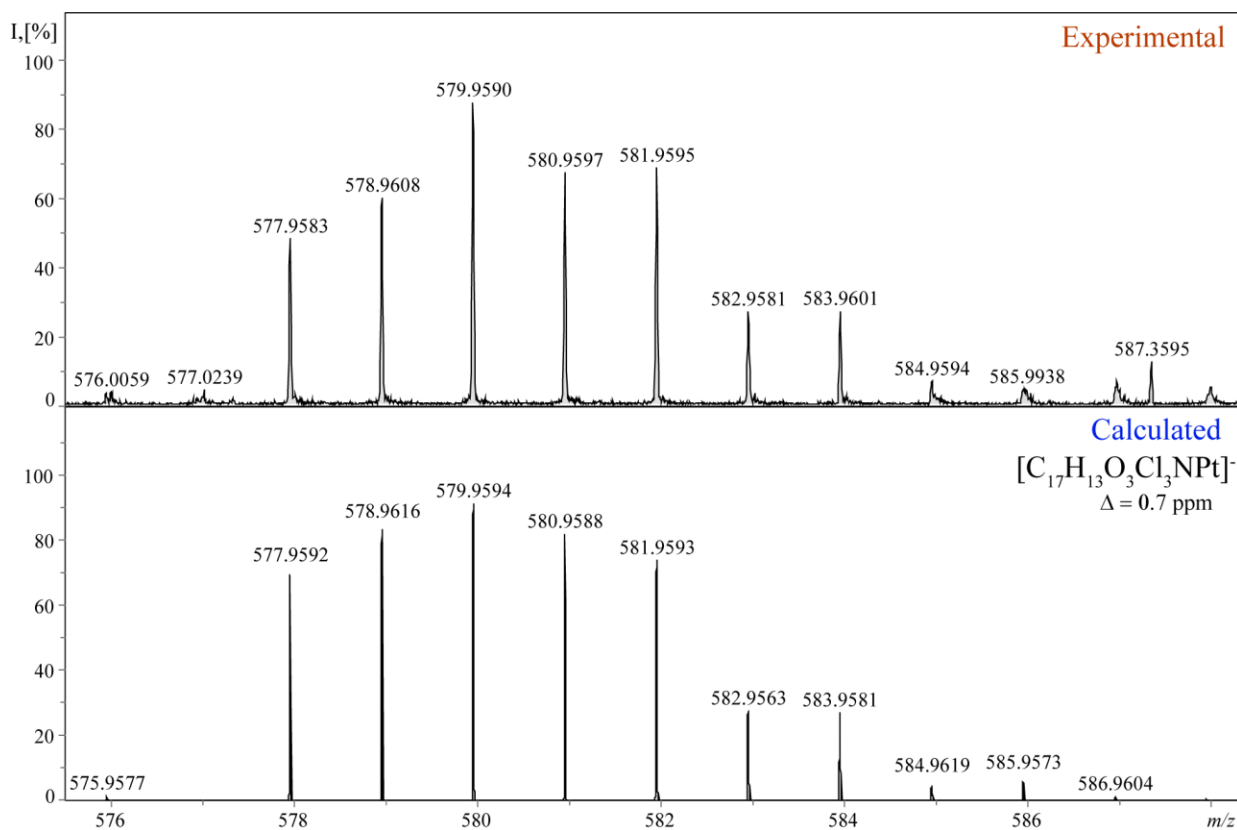

**Figure S10.** Experimentally detected and theoretical ESI(-)HRMS spectra of Pt/MWCNT<sub>chl</sub>/THF/1h; main experimental peak  $[M-H]^- = 579.9590$  Da, calculated for  $[C_{17}H_{13}O_3Cl_3NPt]^- = 579.9594$  Da,  $\Delta = 0.7$  ppm.



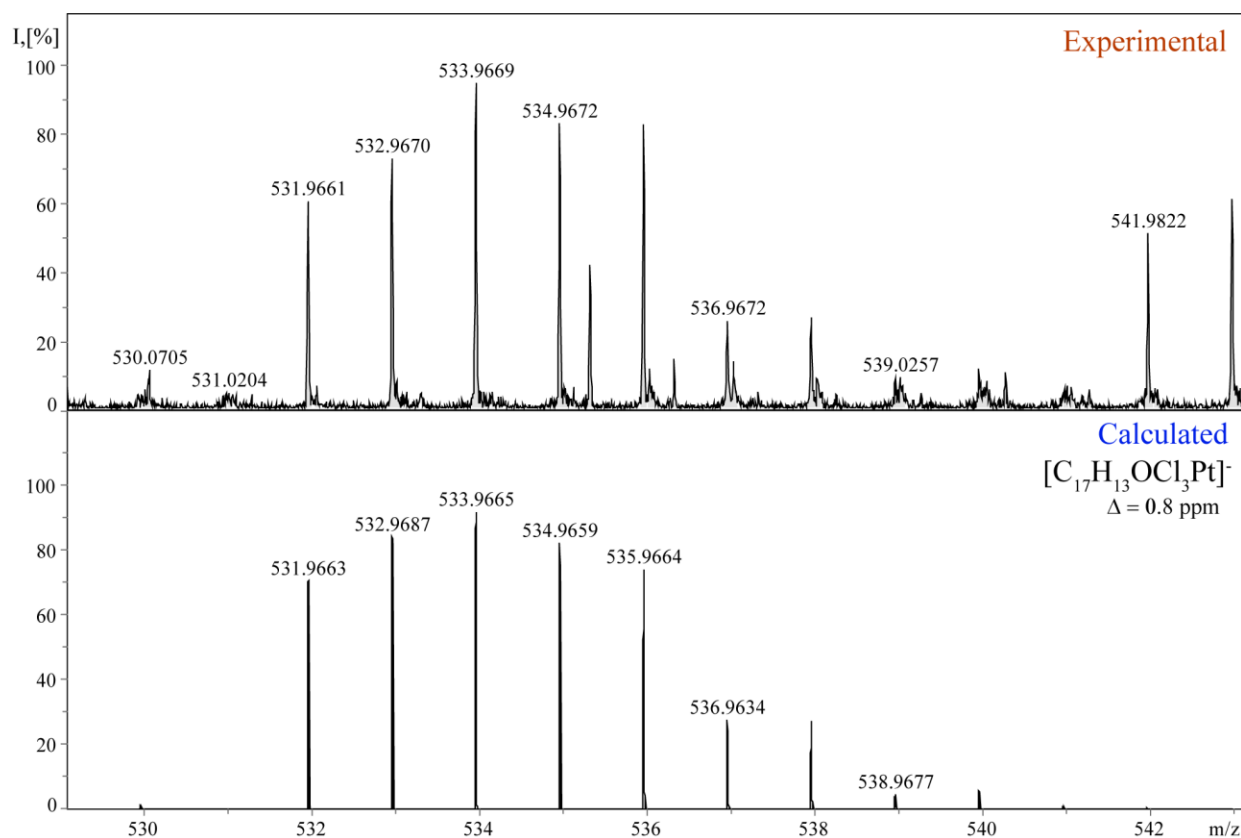

**Figure S11.** Experimentally detected and theoretical ESI(-)HRMS spectra of Pt/MWCNT<sub>chl</sub>/THF/1h; main experimental peak  $[M-H]^- = 533.9669 \text{ Da}$ , calculated for  $[C_{17}H_{13}OCl_3Pt]^- = 533.9665 \text{ Da}$ ,  $\Delta = 0.8 \text{ ppm}$ .

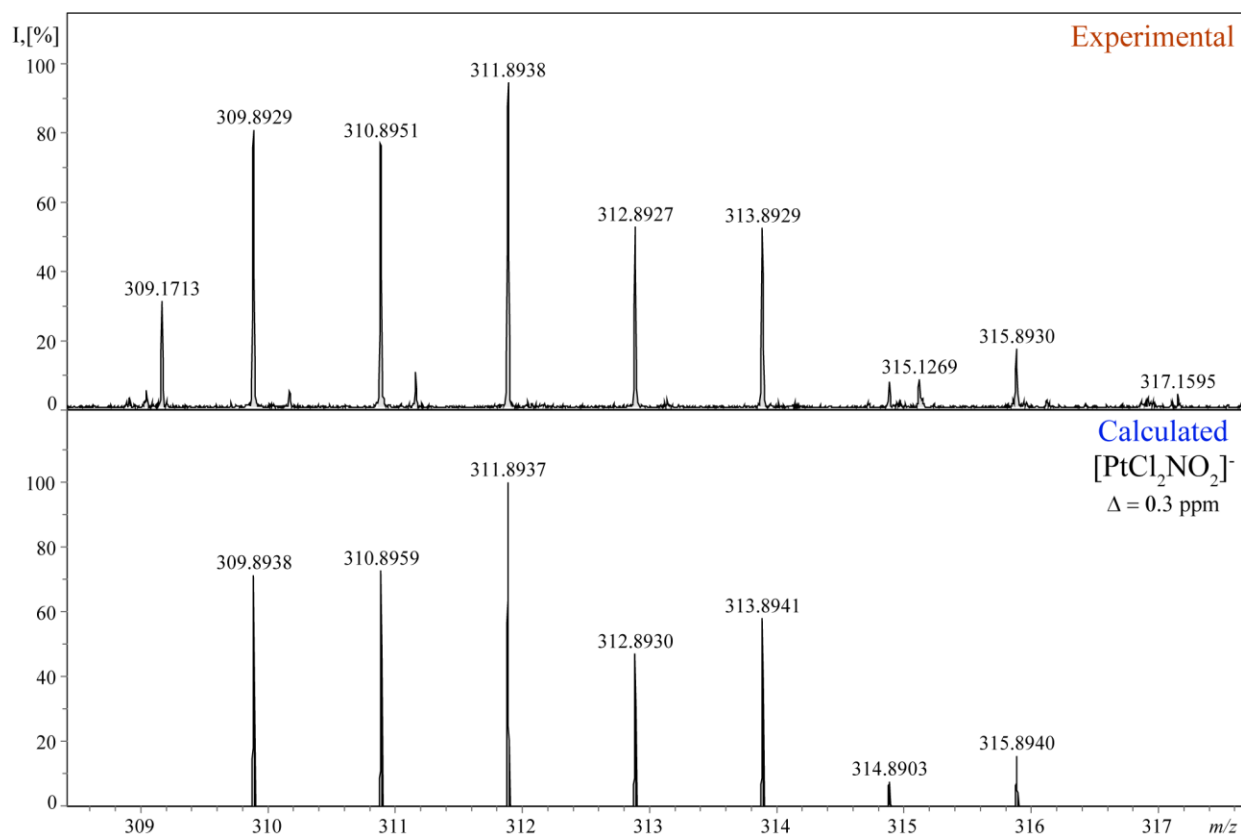

**Figure S12.** Experimentally detected and theoretical ESI(-)HRMS spectra of Pt/MWCNT<sub>chl</sub>/THF/1h; main experimental peak  $[M]^- = 311.8938 \text{ Da}$ , calculated for  $[PtCl_2NO_2]^- = 311.8937 \text{ Da}$ ,  $\Delta = 0.3 \text{ ppm}$ .

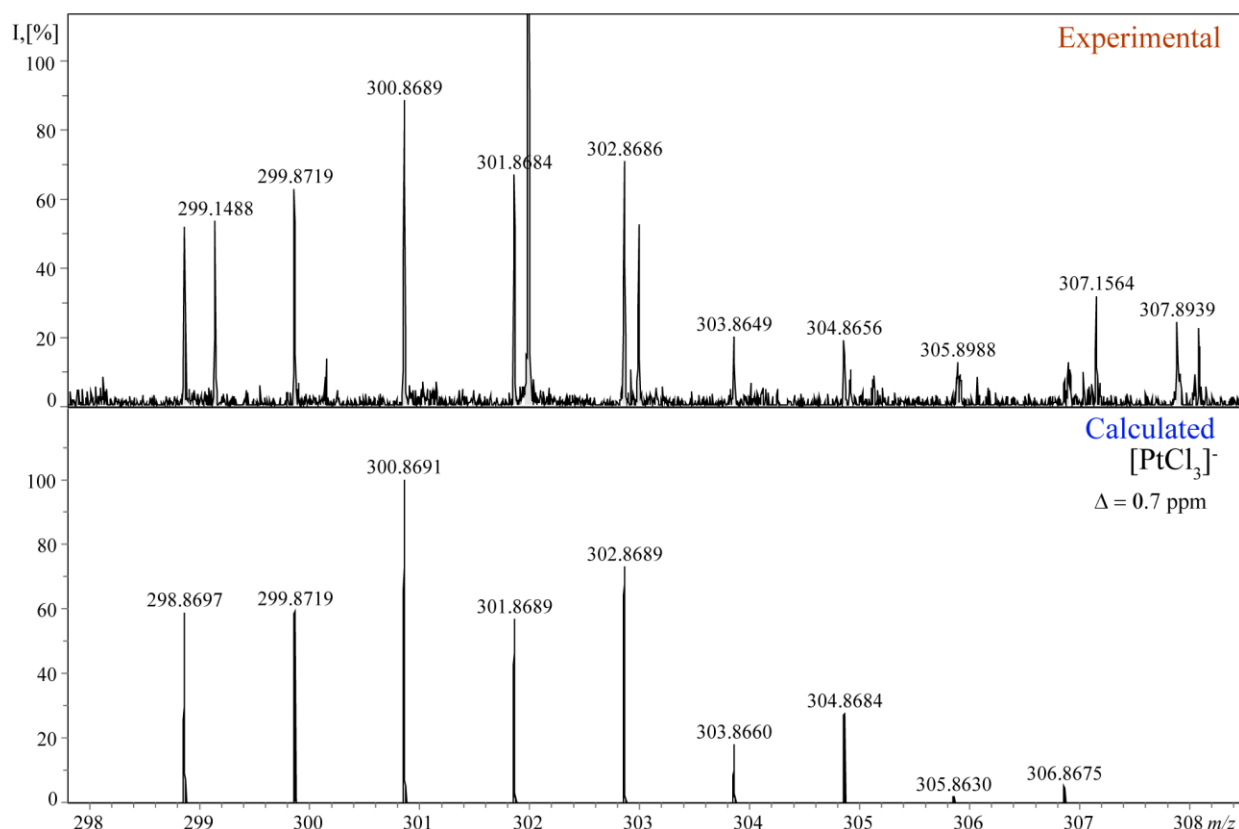

**Figure S13.** Experimentally detected and theoretical ESI(-)HRMS spectra of Pt/MWCNT<sub>chl</sub>/THF/1h; main experimental peak [M]<sup>-</sup> = 300.8689 Da, calculated for [PtCl<sub>3</sub>]<sup>-</sup> = 300.8691 Da, Δ = 0.7 ppm.

**Table S3.** Pt NPs size confidence intervals before and 1 h after the experiment.

| Entry | Precatalyst             | Pt NPs size after                    |                            |
|-------|-------------------------|--------------------------------------|----------------------------|
|       |                         | Initial Pt NPs size, nm <sup>a</sup> | treatment, nm <sup>b</sup> |
| 1     | Pt/C                    | 3.9 ± 1.0                            | 3.3 ± 1.3                  |
| 2     | Pt/MWCNT <sub>chl</sub> | 2.1 ± 0.6                            | 1.9 ± 0.5                  |
| 3     | Pt/MWCNT <sub>THF</sub> | 2.2 ± 0.2                            | 2.0 ± 0.7                  |
| 4     | Pt/MWCNT <sub>tol</sub> | 2.1 ± 0.6                            | 1.6 ± 0.5                  |

<sup>a</sup> Pt NPs size on the surface of the initial catalysts before the leaching experiment; <sup>b</sup> Pt NPs size on the surface of the catalysts after 1 h of treatment.

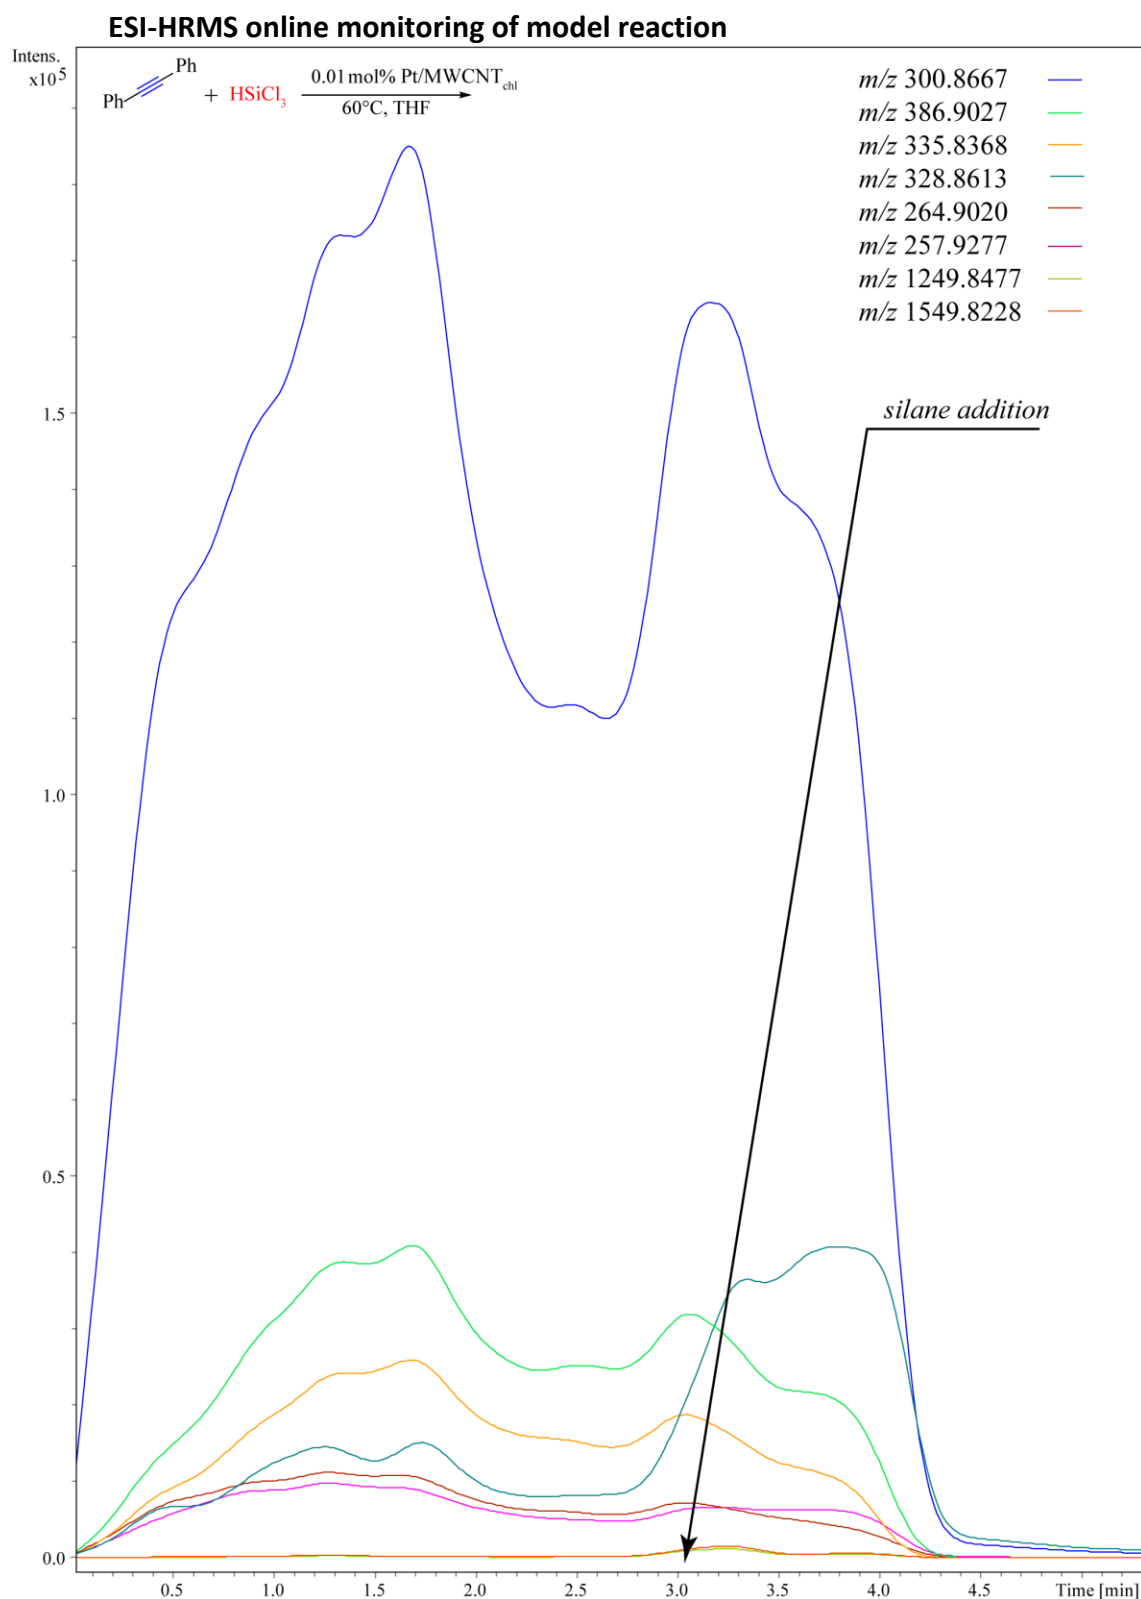

**Figure. S14.** Gauss-smoothed curves (3 sec, 5 cycles) for the real-time abundances of ions in tolane (**1a**) and trichlorosilane (**2a**) reaction catalysed by Pt/MWCNT<sub>chl</sub>.

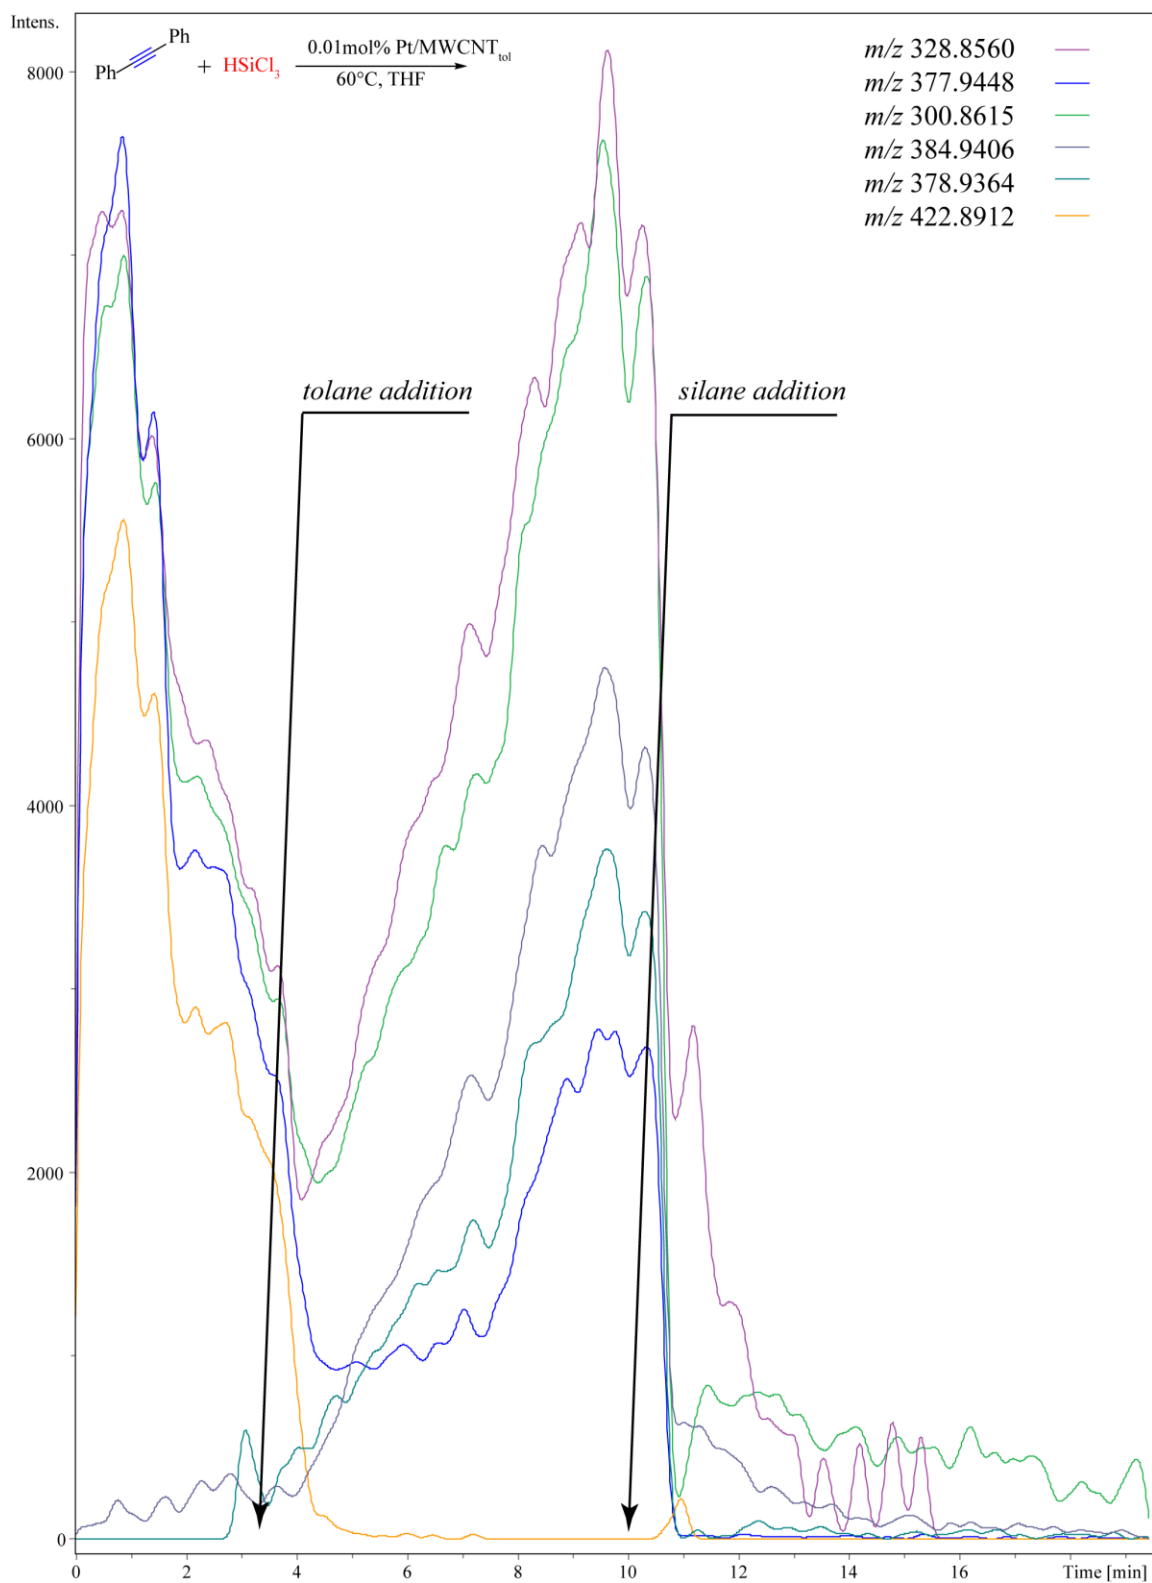

**Figure. S15.** Gauss-smoothed curves (3 sec, 5 cycles) for the real-time abundances of ions in toluene (**1a**) and trichlorosilane (**2a**) reaction-catalysed Pt/MWCNT<sub>tol</sub>.

## ESI-HRMS spectra of the allyl bromide hydrosilylation reaction mixture

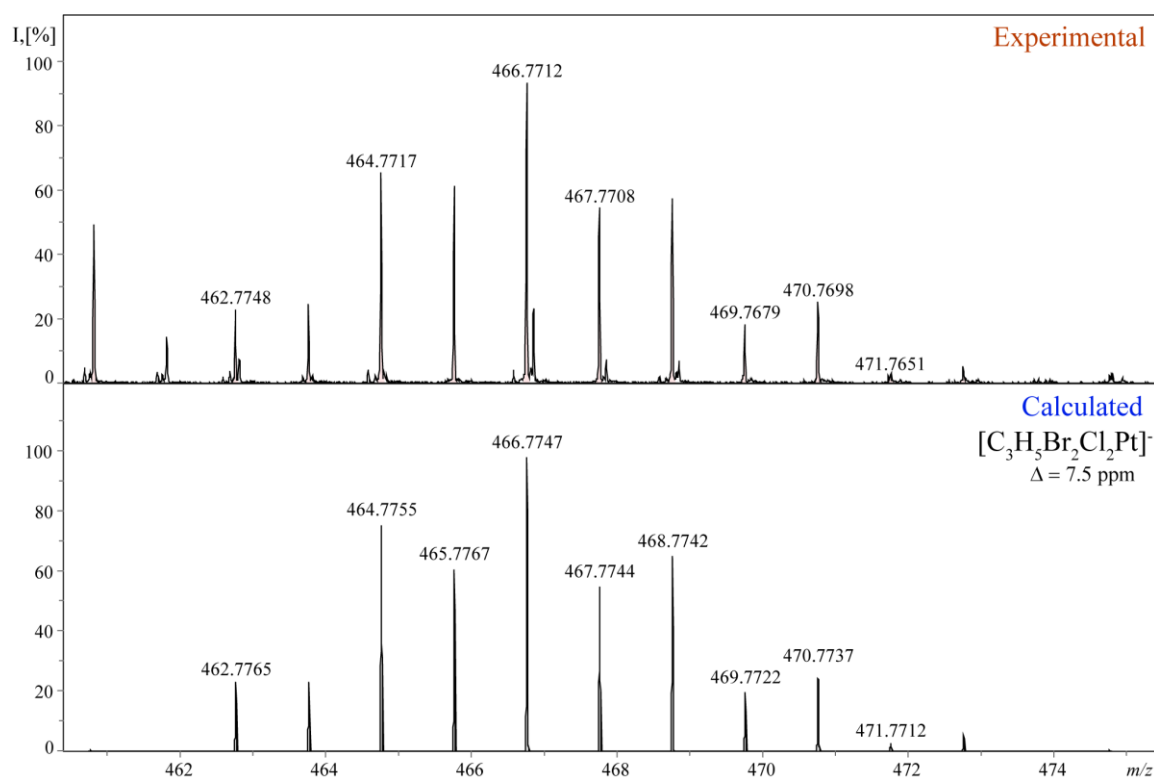

**Figure S16.** Experimentally detected and theoretical ESI(-)HRMS spectra of Pt/MWCNT<sub>THF</sub>/THF/5h; main experimental peak  $[M]^- = 466.7712$  Da, calculated for  $[C_3H_5PtBr_2Cl_2]^- = 466.7747$  Da,  $\Delta = 7.5$  ppm.

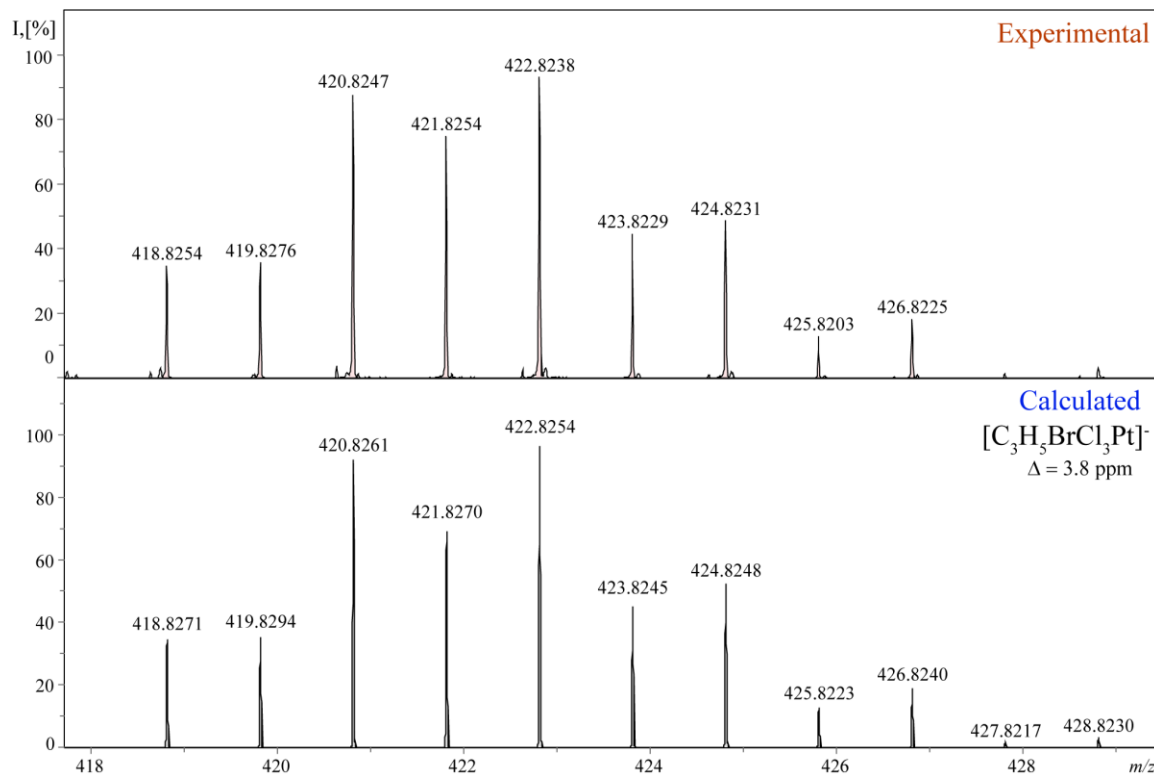

**Figure S17.** Experimentally detected and theoretical ESI(-)HRMS spectra of Pt/MWCNT<sub>THF</sub>/THF/5h; main experimental peak  $[M]^- = 422.8238$  Da, calculated for  $[C_3H_5PtBrCl_3]^- = 422.8254$  Da,  $\Delta = 3.8$  ppm.

Capture of metal clusters in solution using the “nanofishing” procedure

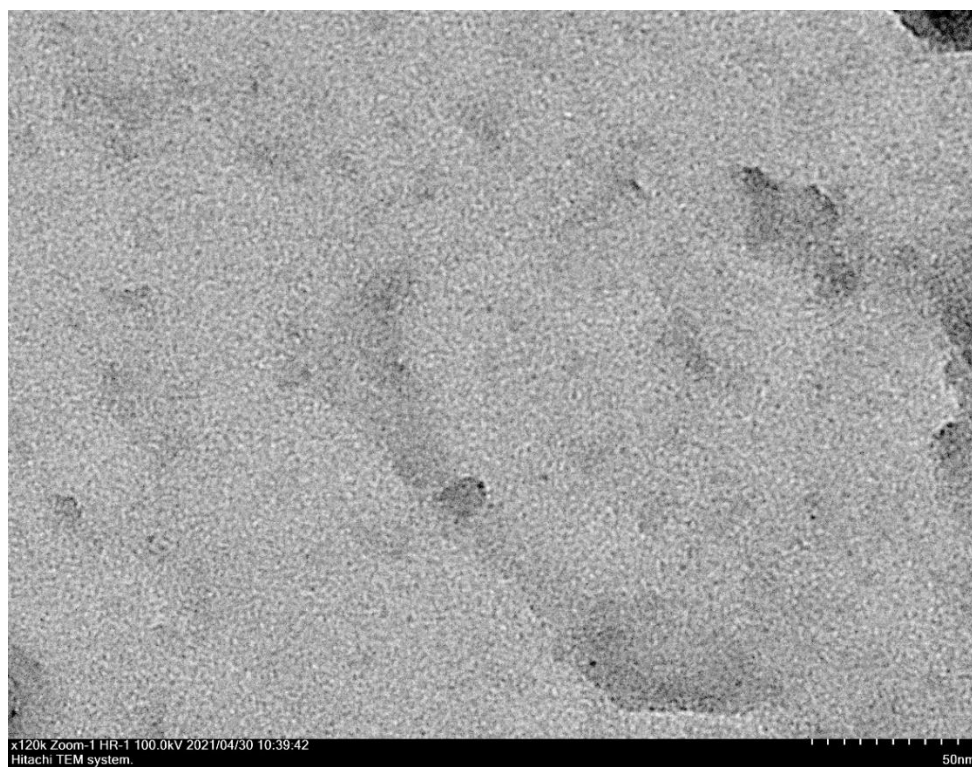

**Figure S18.** TEM image of Pt NPs from  $\text{HSiCl}_3$  (**2a**) and  $\text{Ph}_2\text{C}_2$  (**1a**) reaction supernatant in the presence of  $\text{Pt/MWCNT}_{\text{chI}}$ .

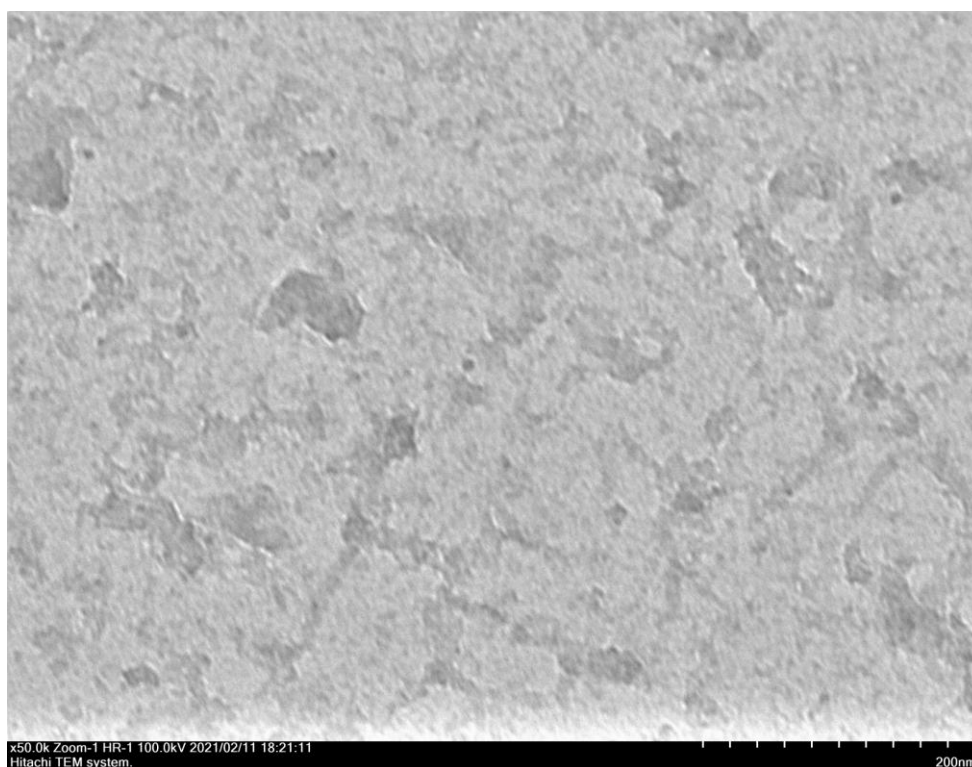

**Figure S19.** TEM image of Pt NPs from  $\text{HSiCl}_3$  (**2a**) and  $\text{Ph}_2\text{C}_2$  (**1a**) reaction supernatant in the presence of  $\text{Pt/MWCNT}_{\text{THF}}$ .

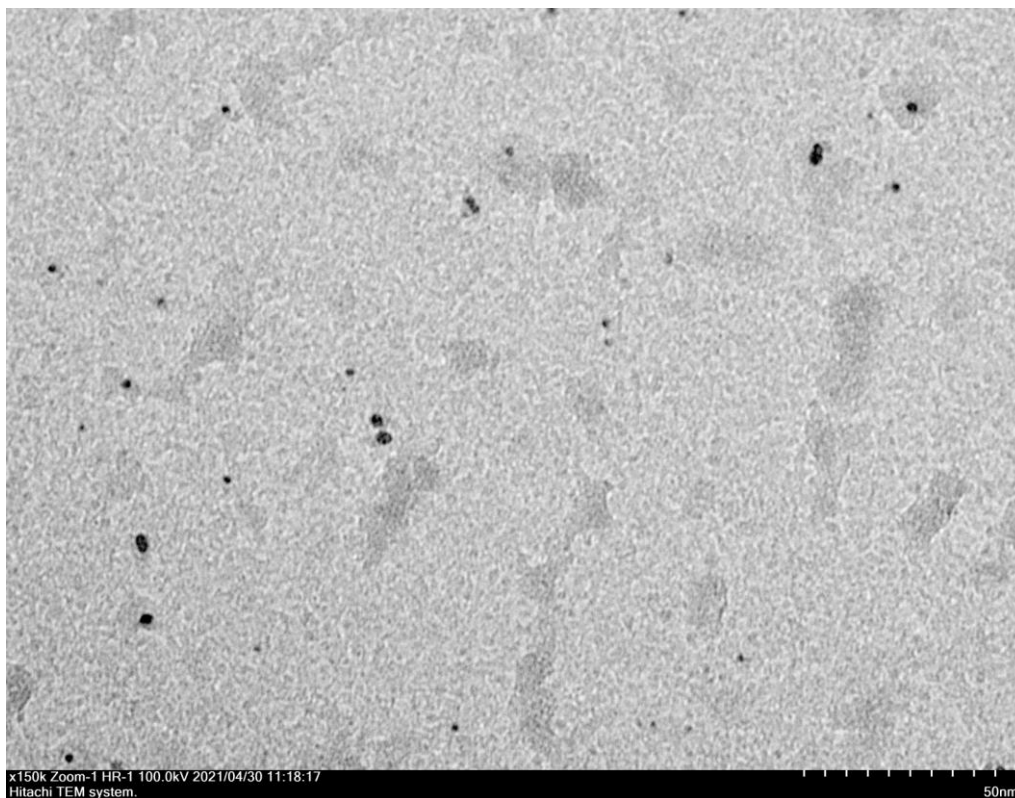

**Figure S20.** TEM image of Pt NPs from  $\text{HSiCl}_3$  (**2a**) and  $\text{Ph}_2\text{C}_2$  (**1a**) reaction supernatant in the presence of  $\text{Pt/MWCNT}_{\text{tot}}$ .

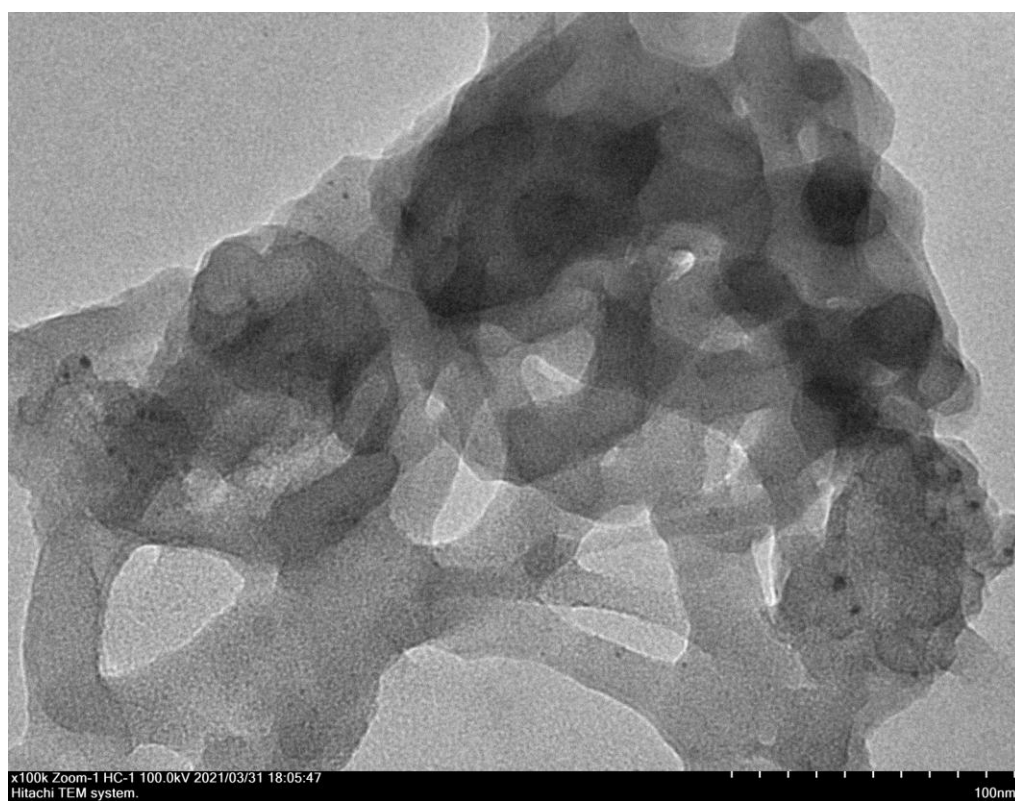

**Figure S21.** TEM image of Pt NPs from  $\text{HSiCl}_3$  (**2a**) and  $\text{Ph}_2\text{C}_2$  (**1a**) reaction supernatant in the presence of  $\text{Pt/C}$ .

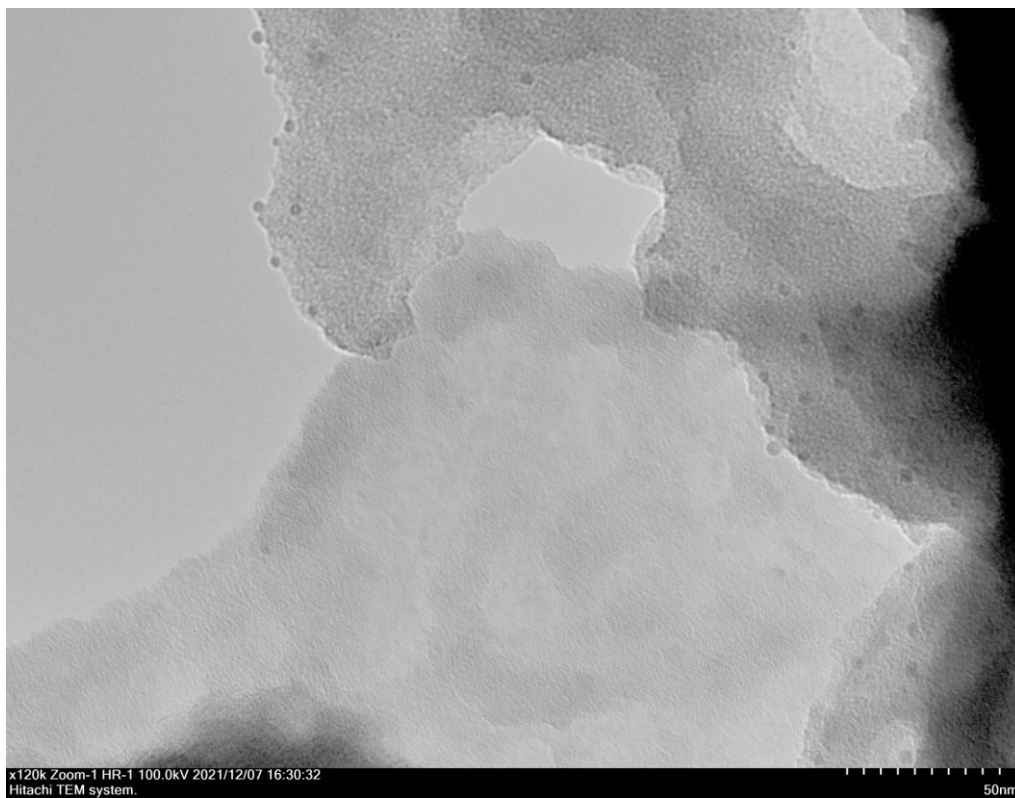

**Figure S22.** TEM image of Pt NPs from  $\text{HSiCl}_3$  (**2a**) and allyl bromide reaction supernatant in the presence of Pt/C.

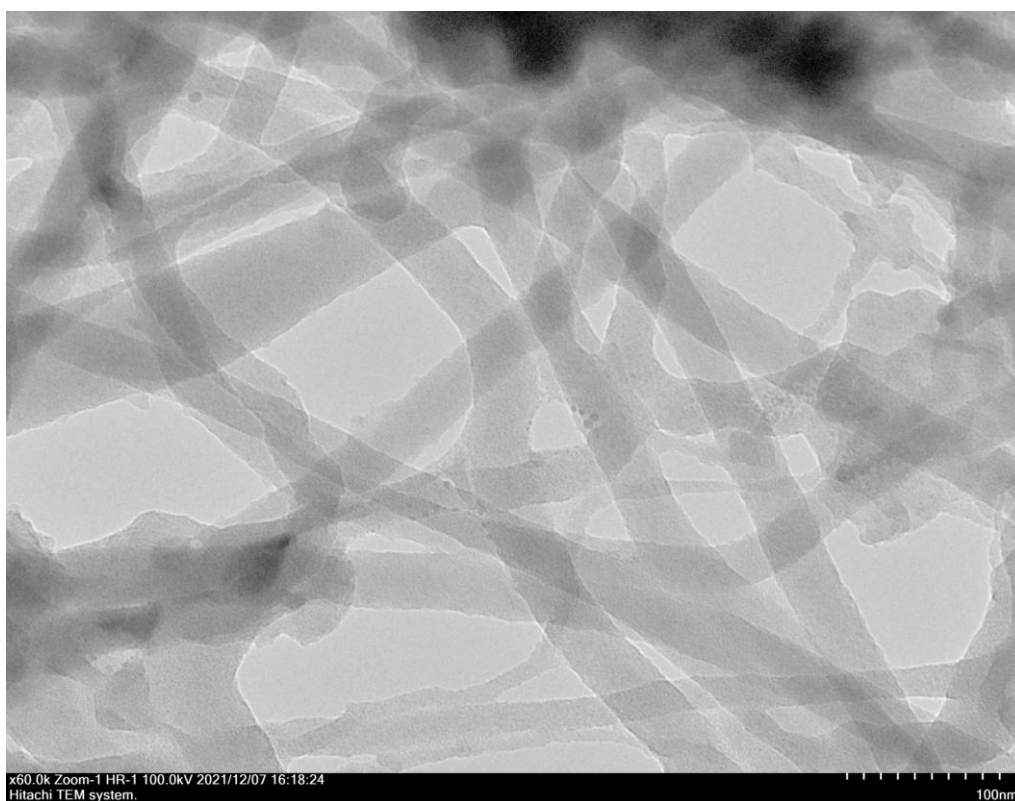

**Figure S23.** TEM image of Pt NPs from  $\text{HSiCl}_3$  (**2a**) and allyl bromide reaction supernatant in the presence of Pt/MWCNT<sub>THF</sub>.



### Capture of metal clusters in solution using Fairlamb's method

The Fairlamb's method<sup>2</sup> was provided to check the aggregation of Pt particles in the supernatant. The model reaction was carried out in the presence of Pt/MWCNT<sub>chl</sub>, and the reaction mixture was filtered by using a PTFE membrane with a pore size of 0.45  $\mu\text{m}$ . 20 mg of PVP (polyvinylpyrrolidone, mol. wt. 40000) was added into 1 ml of the supernatant. The precipitate was sampled on the TEM grid and washed with ethanol. The grid was examined by use of TEM.

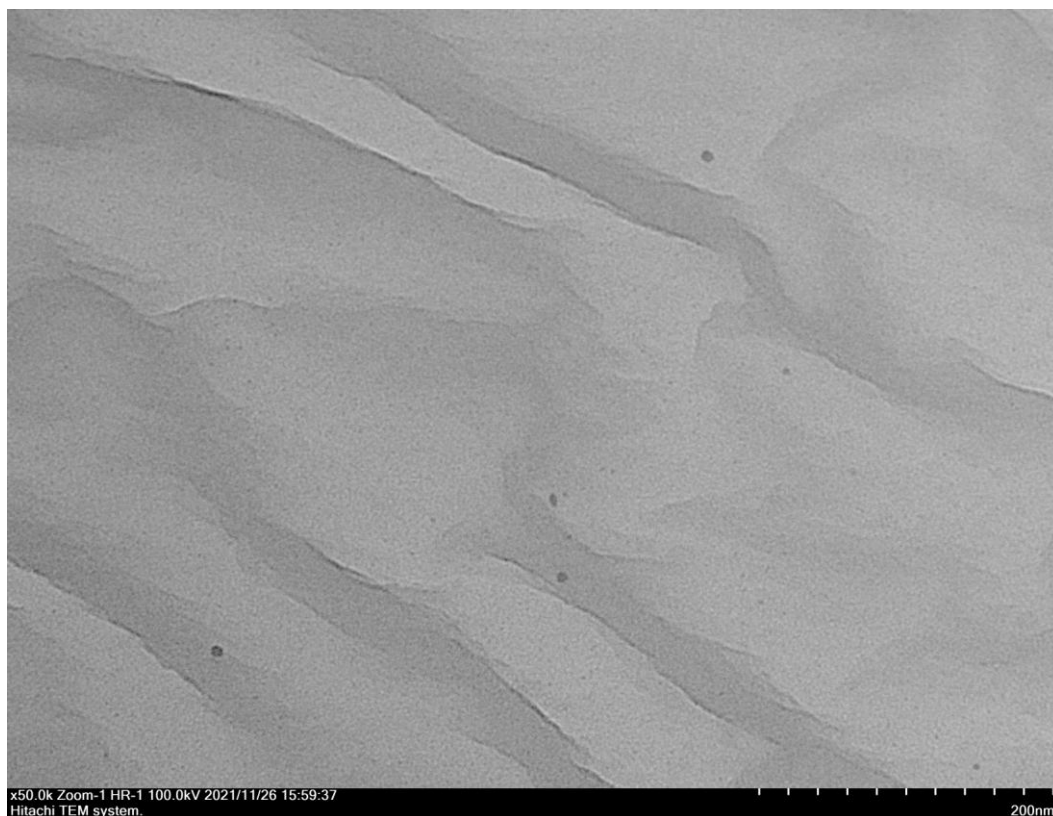

**Figure S24.** TEM image of Pt NPs from HSiCl<sub>3</sub> (**2a**) and Ph<sub>2</sub>C<sub>2</sub> (**1a**) reaction solution in the presence of Pt/MWCNT<sub>chl</sub> by use of PVP (polyvinylpyrrolidone).

## Electron microscopy study of the catalysts isolated after the reaction

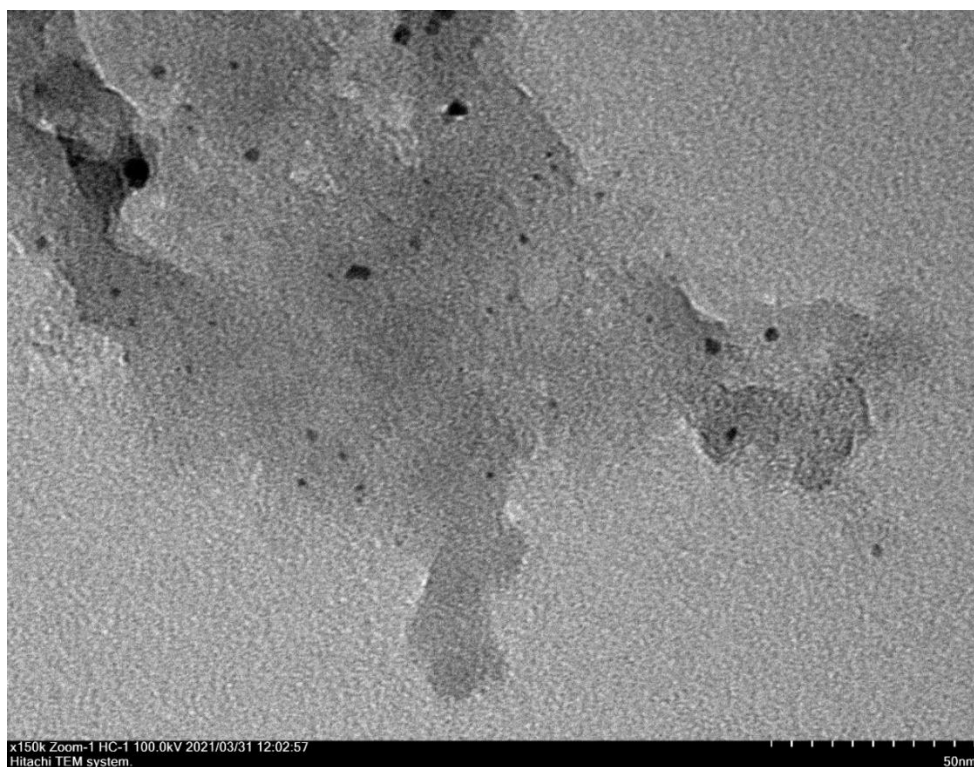

**Figure S25.** TEM images of Pt nanoparticles of Pt/C after the model reaction.

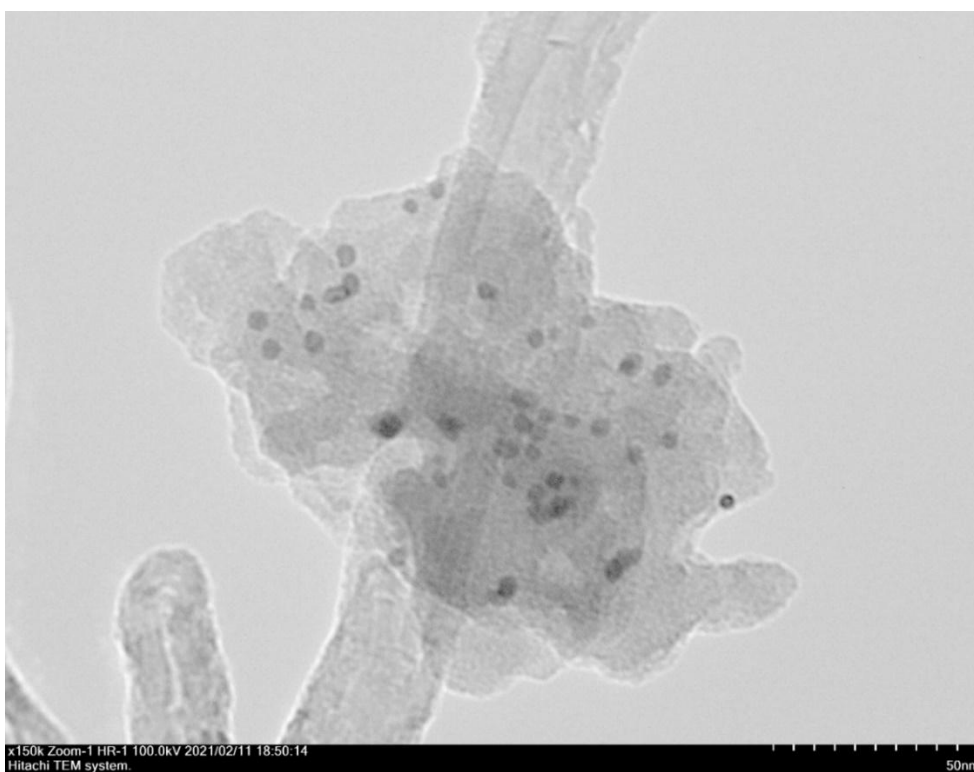

**Figure S26.** TEM images of Pt nanoparticles of Pt/MWCNT<sub>chl</sub> after the model reaction.

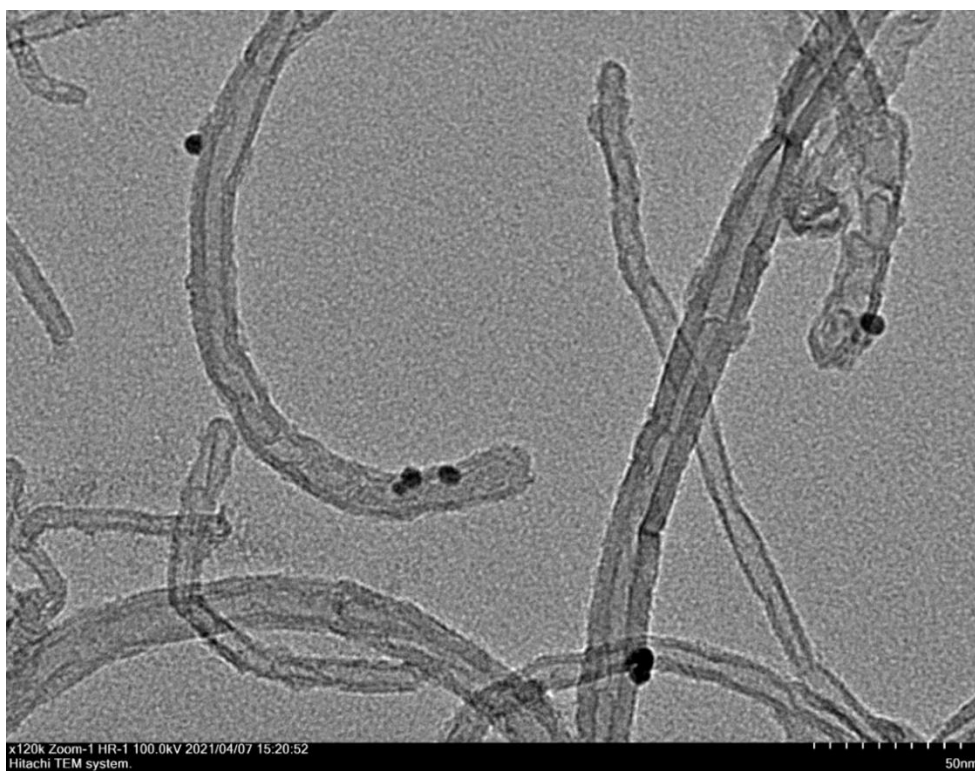

**Figure S27.** TEM images of Pt nanoparticles of Pt/MWCNT<sub>THF</sub> after the model reaction.

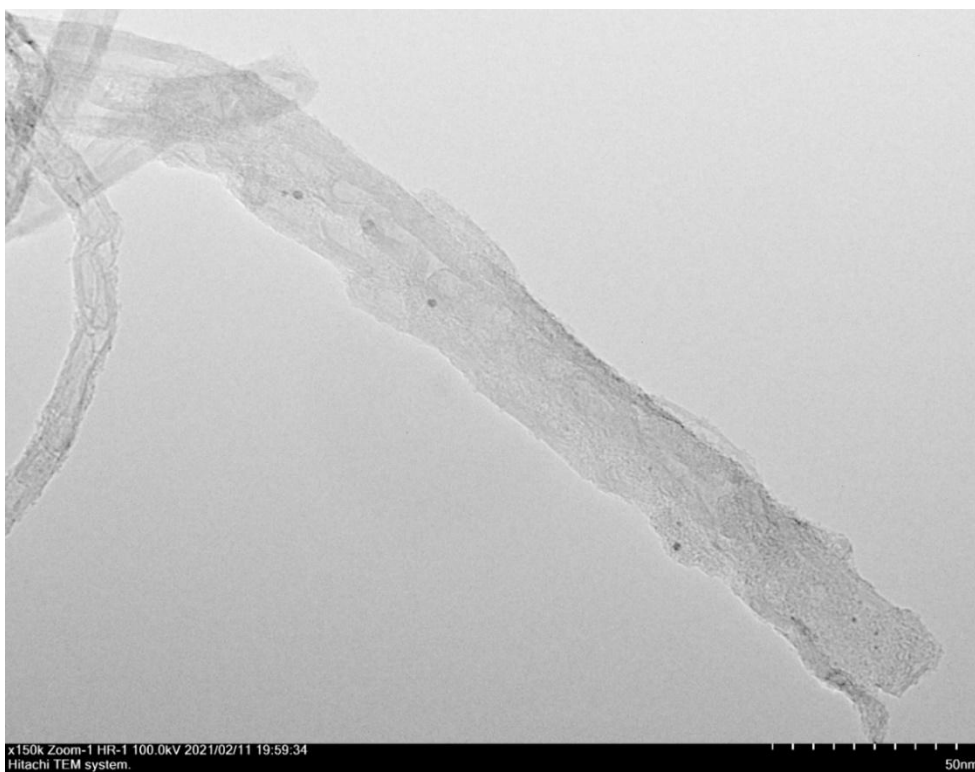

**Figure S28.** TEM images of Pt nanoparticles of Pt/MWCNT<sub>tol</sub> after the model reaction.

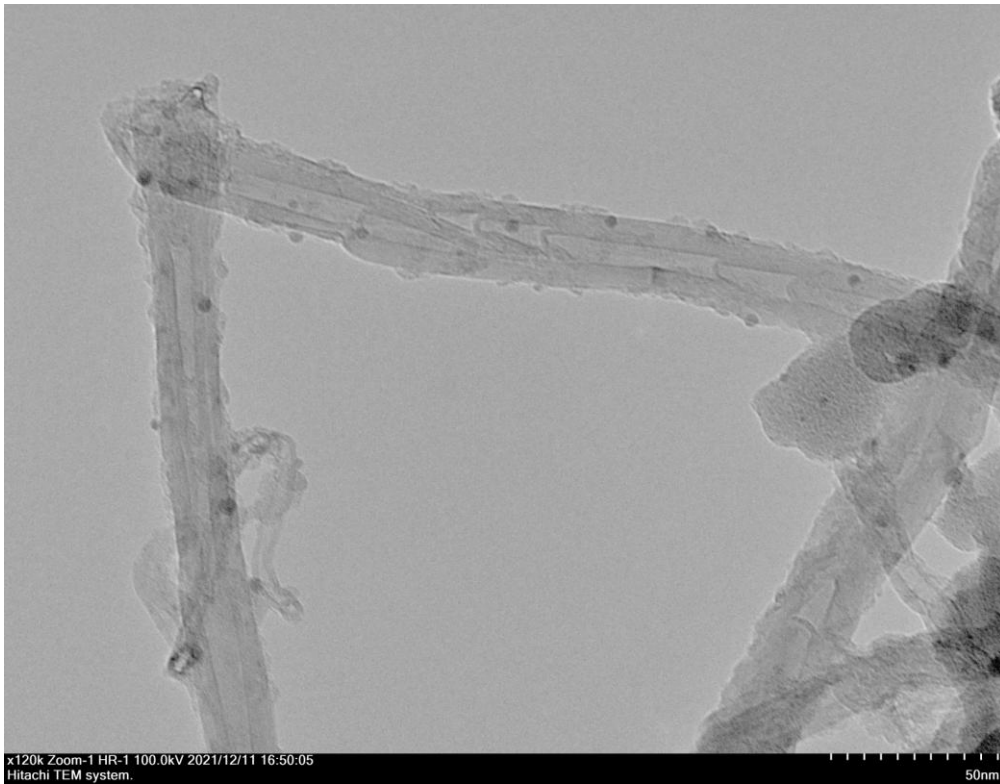

**Figure S29.** TEM images of Pt nanoparticles of Pt/MWCNT<sub>THF</sub> after allyl bromide hydrosilylation by HSiCl<sub>3</sub>.

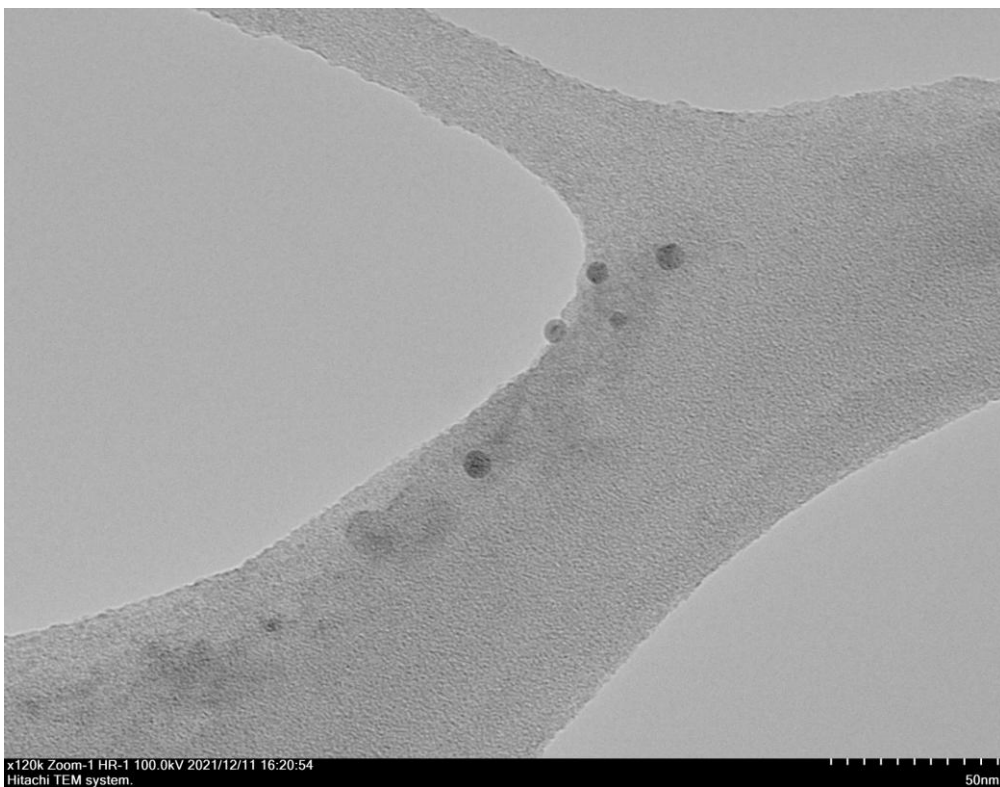

**Figure S30.** TEM images of Pt nanoparticles of Pt/C after allyl bromide hydrosilylation by HSiCl<sub>3</sub>.

**Electron microscopy study of Pt/MWCNT<sub>THF</sub> and Pt/C catalysts isolated after reactions with silane variation**

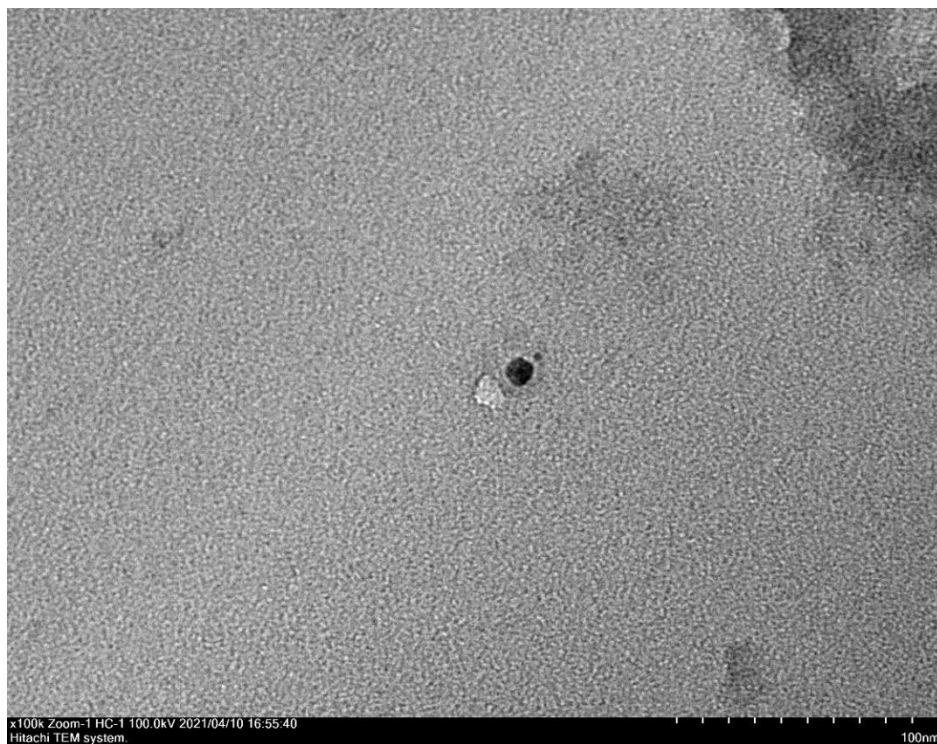

**Figure S31.** TEM image of Pt NPs from HSiCl<sub>3</sub> (**2a**) and Ph<sub>2</sub>C<sub>2</sub> (**1a**) reaction supernatant in the presence of Pt/MWCNT<sub>THF</sub>.

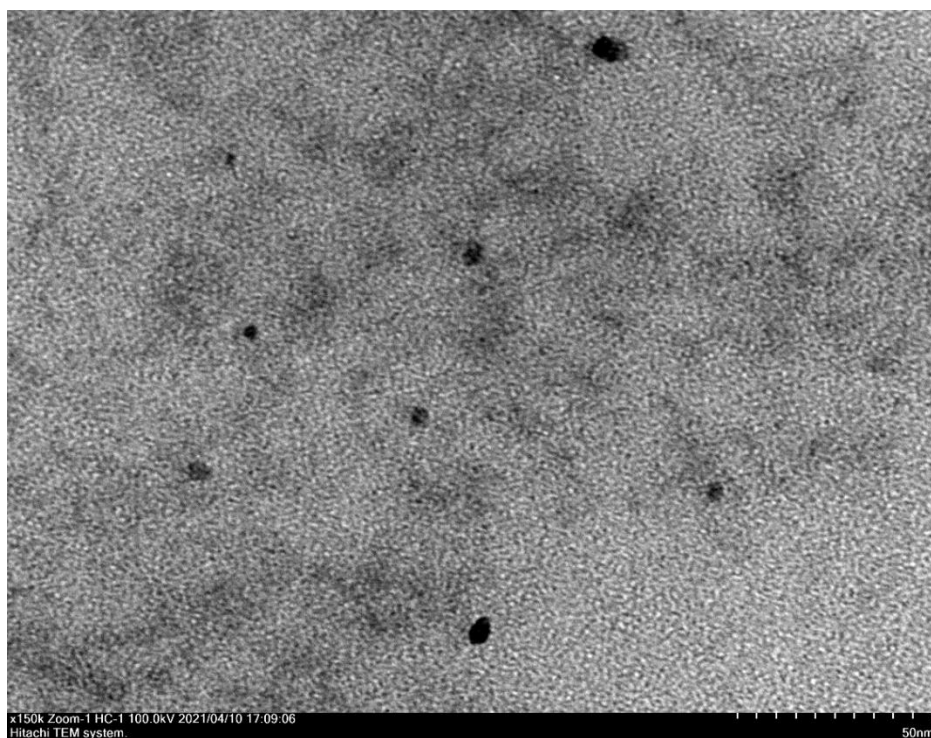

**Figure S32.** TEM image of Pt NPs from HSiEt<sub>3</sub> (**2b**) and Ph<sub>2</sub>C<sub>2</sub> (**1a**) reaction supernatant in the presence of Pt/MWCNT<sub>THF</sub>.

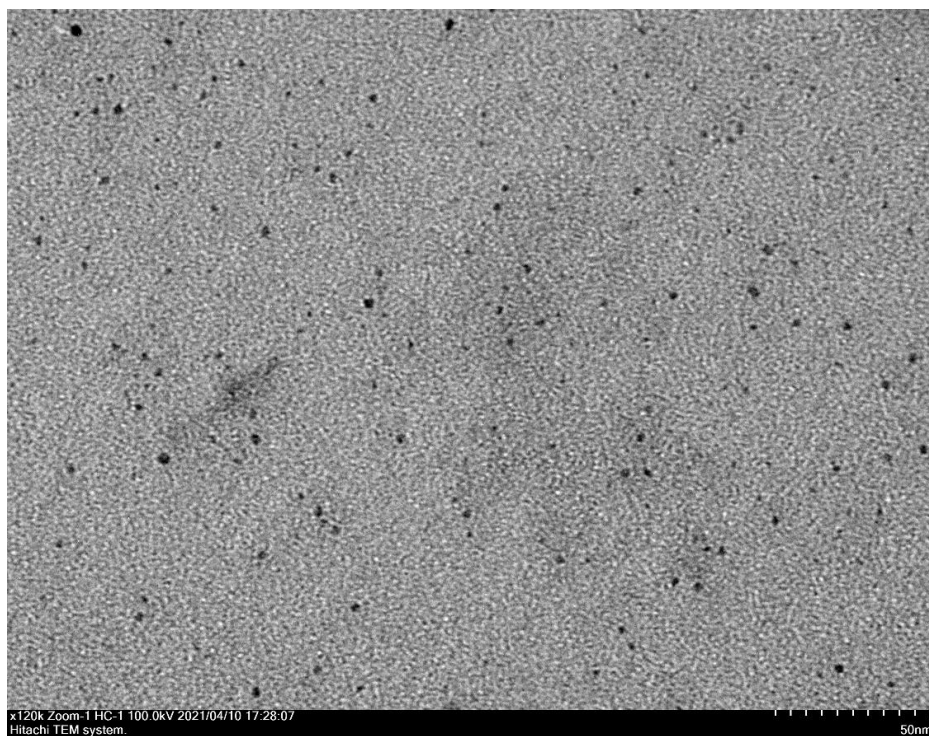

**Figure S33.** TEM image of Pt NPs from HSiPh<sub>3</sub> (**2c**) and Ph<sub>2</sub>C<sub>2</sub> (**1a**) reaction supernatant in the presence of Pt/MWCNT<sub>THF</sub>.

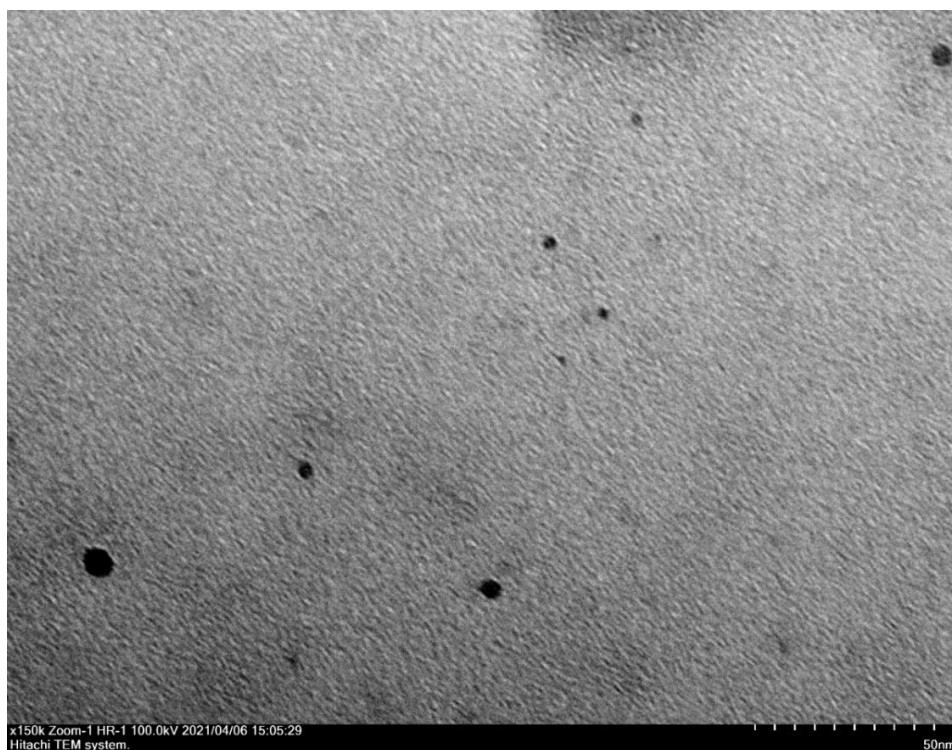

**Figure S34.** TEM image of Pt NPs from HSiCl<sub>3</sub> (**2a**) and Ph<sub>2</sub>C<sub>2</sub> (**1a**) reaction supernatant in the presence of Pt/C.

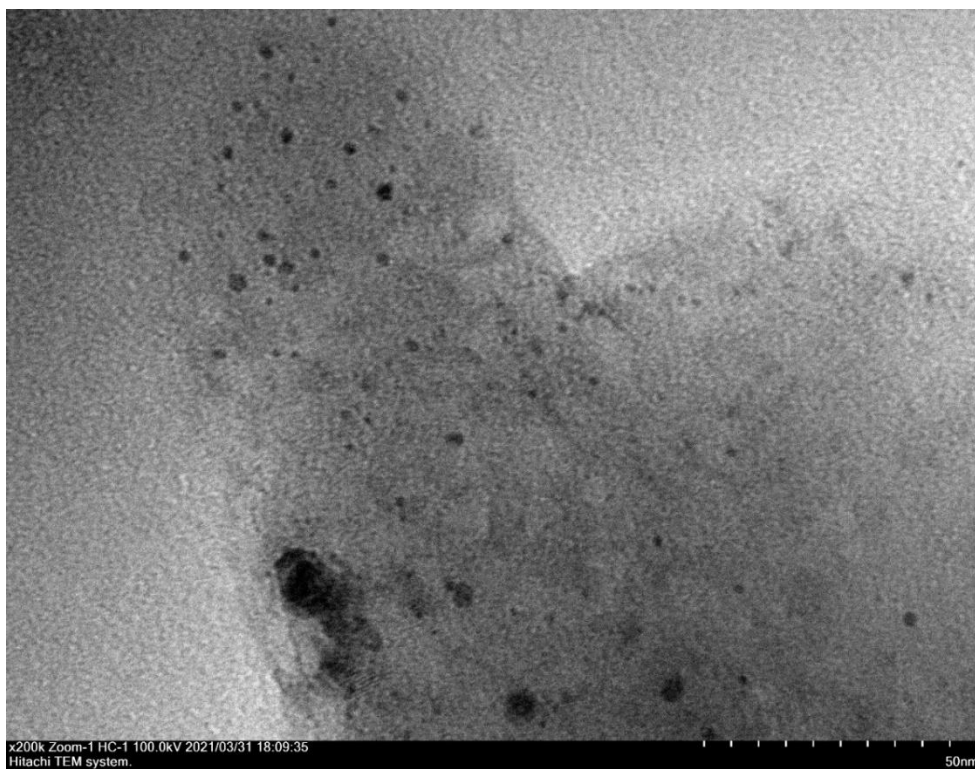

**Figure S35.** TEM image of Pt NPs from HSiEt<sub>3</sub> (**2b**) and Ph<sub>2</sub>C<sub>2</sub> (**1a**) reaction supernatant in the presence of Pt/C.

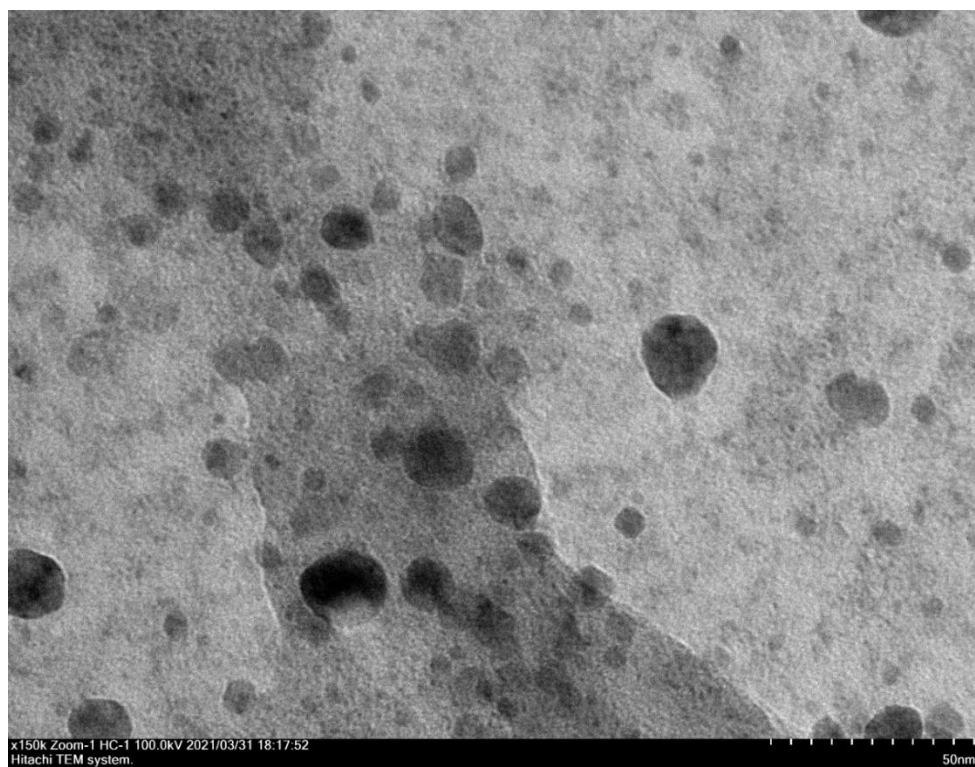

**Figure S36.** TEM image of Pt NPs from HSiPh<sub>3</sub> (**2c**) and Ph<sub>2</sub>C<sub>2</sub> (**1a**) reaction supernatant in the presence of Pt/C.

## Platinum nanoparticles size distribution histograms

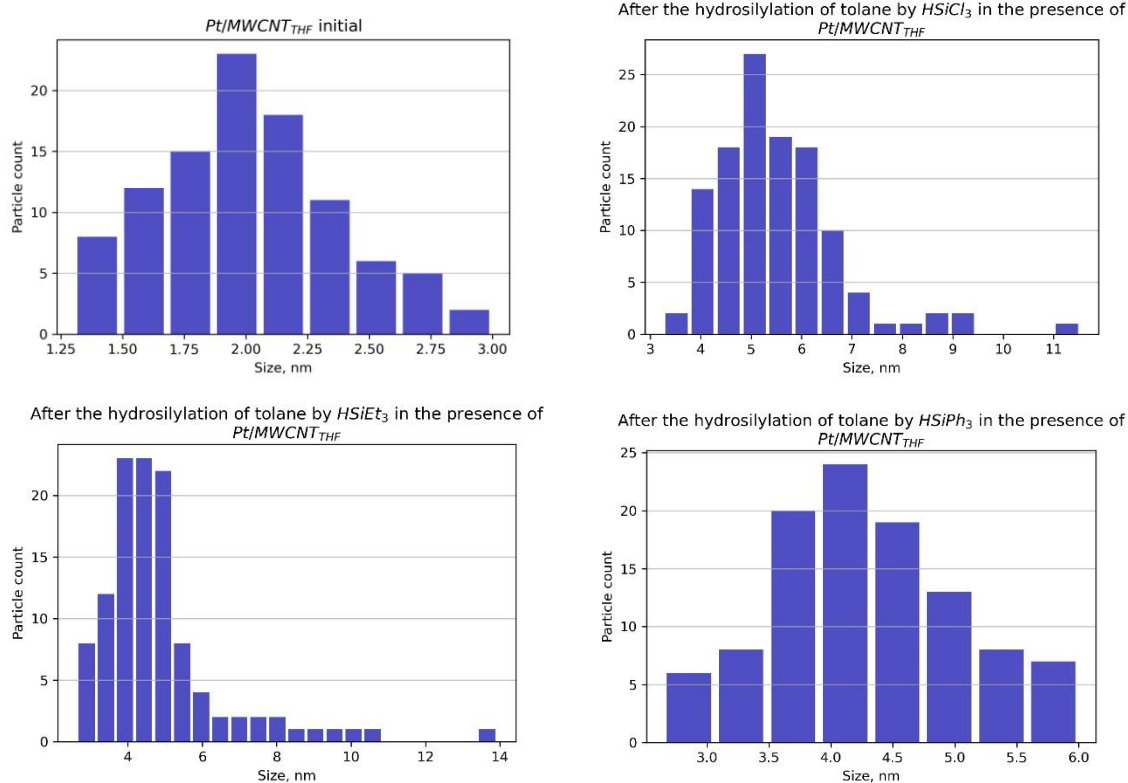

**Figure S37.** Size distribution histograms of Pt nanoparticles on Pt/MWCNT<sub>THF</sub> before and after model reaction with different silanes.

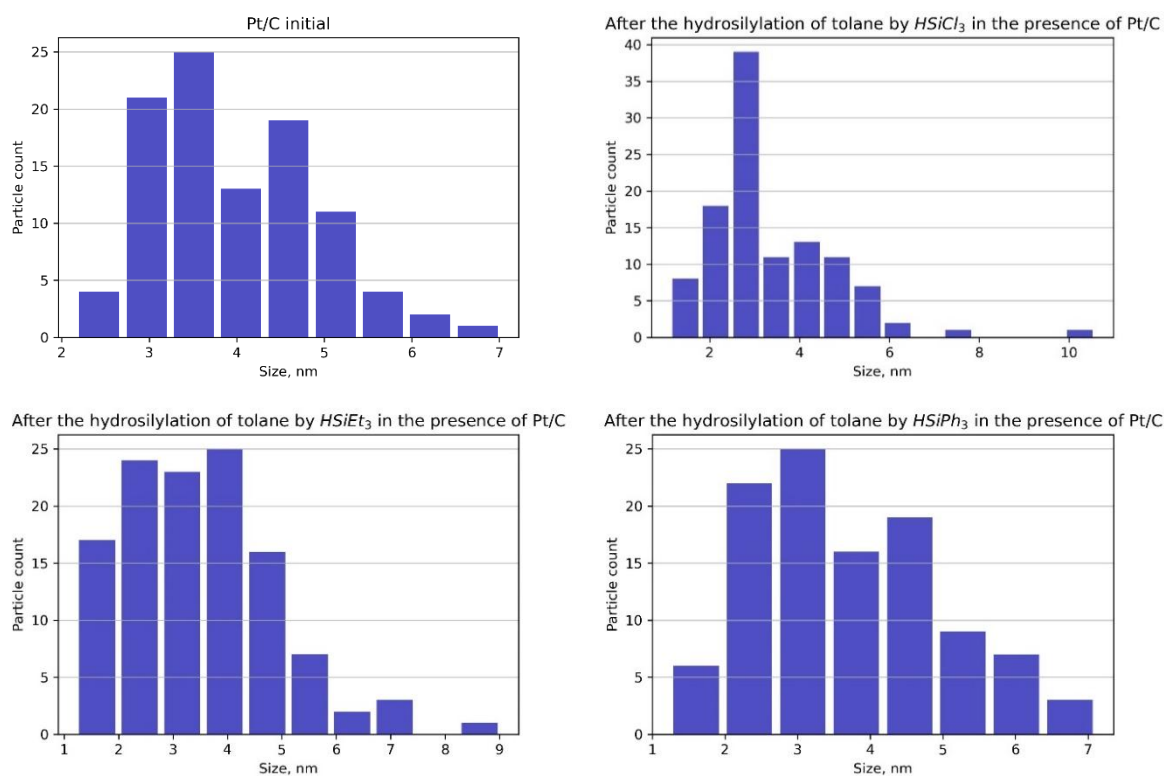

**Figure S38.** Size distribution histograms of Pt nanoparticles on Pt/C before and after model reaction with different silanes.



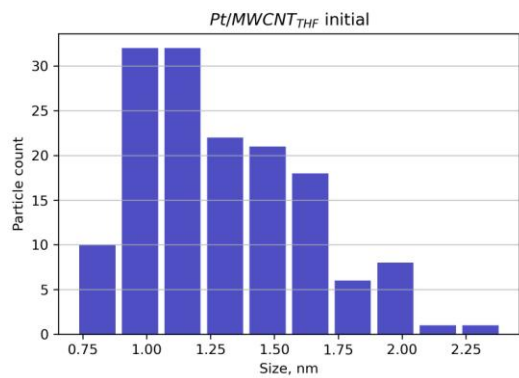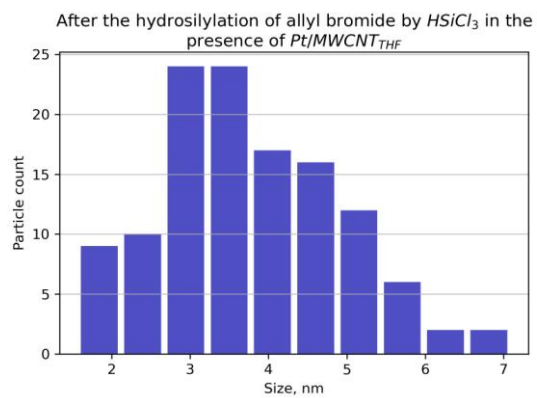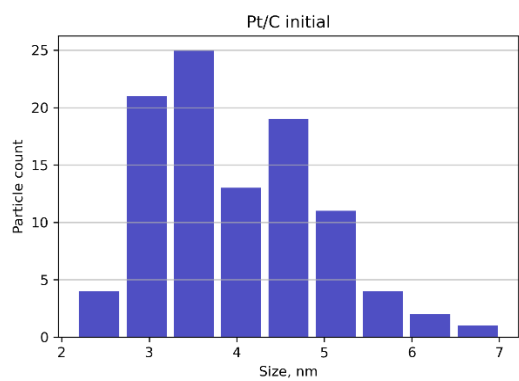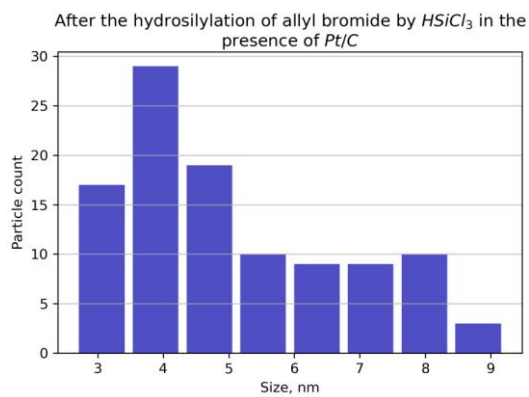

**Figure S39.** Size distribution histograms of Pt nanoparticles on *Pt/MWCNT<sub>THF</sub>* and *Pt/C* before and after allyl bromide hydrosilylation with  $HSiCl_3$ .

### Hydrosilylation of tolane in the presence of Pt<sub>2</sub>dba<sub>3</sub>

A comparative study on the catalytic activity of the Pt<sub>2</sub>dba<sub>3</sub> complex and premixed system was carried out. In four separate experiments, Pt/MWCNT<sub>THF</sub>, Pt<sub>2</sub>dba<sub>3</sub> with MWCNT, Pt<sub>2</sub>dba<sub>3</sub>, and MWCNT were used as catalysts in the model reaction (Table S4).

**Table S4.** Model reaction in the presence of the Pt<sub>2</sub>dba<sub>3</sub>

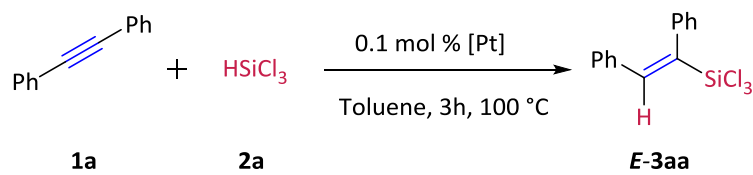

| Entry | Catalyst                                 | Yield, % <sup>a</sup> |
|-------|------------------------------------------|-----------------------|
| 1     | Pt/MWCNT <sub>THF</sub>                  | 42                    |
| 2     | Pt <sub>2</sub> dba <sub>3</sub> , MWCNT | 77                    |
| 3     | Pt <sub>2</sub> dba <sub>3</sub>         | 98                    |
| 4     | MWCNT                                    | 0                     |

<sup>a</sup> Yield of the products were determined by GC-MS.

Pt<sub>2</sub>dba<sub>3</sub> and Pt<sub>2</sub>dba<sub>3</sub>, MWCNT worked as homogeneous catalysts (entries 2 and 3, Table S4) and gave yields higher than heterogeneous Pt/MWCNT<sub>THF</sub>.

## Characterization data

**Table S5.** Numbering of products of Pt/MWCNT<sub>THF</sub><sup>-</sup> and Pt/C-catalyzed hydrosilylation of internal alkynes using different silanes. Reaction conditions are summarized in Table S1.

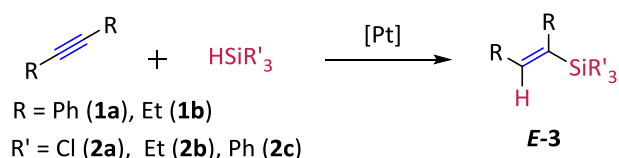

| Entry | Alkyne, R | Silane, R' | Product    |
|-------|-----------|------------|------------|
| 1     | Ph        | Cl         | <b>3aa</b> |
| 2     | Et        |            | <b>3ba</b> |
| 3     | Ph        | Et         | <b>3ab</b> |
| 4     | Et        |            | <b>3bb</b> |
| 5     | Ph        | Ph         | <b>3ac</b> |
| 6     | Et        |            | <b>3bc</b> |

**Table S6.** Numbering of products of Pt/MWCNT<sub>THF</sub><sup>-</sup> and Pt/C-catalyzed hydrosilylation of terminal alkynes using different silanes. Reaction conditions are summarized in Table S1.

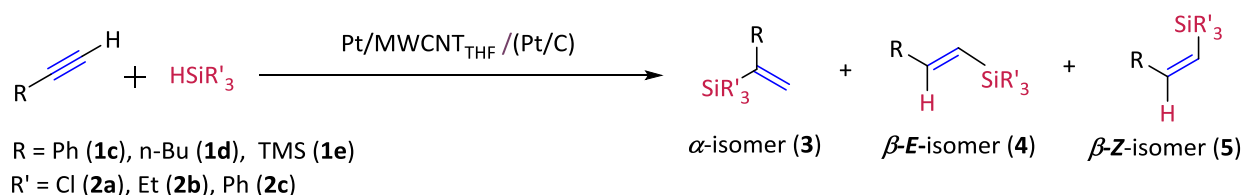

| Entry | Alkyne<br>R | Silane<br>R' | Product distribution, %              |                        |
|-------|-------------|--------------|--------------------------------------|------------------------|
|       |             |              | Pt/MWCNT <sub>THF</sub><br>3 : 4 : 5 | Pt/C<br>3 : 4 : 5      |
| 1     | Ph          | Cl           | <b>4ca</b>                           | <b>4ca</b>             |
| 2     | n-Bu        |              | <b>4da</b>                           | <b>4da</b>             |
| 3     | TMS         |              | <b>4ea</b>                           | <b>4ea</b>             |
| 4     | Ph          | Et           | <b>3cb : 4cb</b>                     | <b>3cb : 4cb</b>       |
| 5     | n-Bu        |              | <b>3db : 4db : 5db</b>               | <b>3db : 4db : 5db</b> |
| 6     | TMS         |              | <b>3eb:4eb</b>                       | <b>3eb:4eb</b>         |
| 7     | TMS         | Ph           | <b>3ec:4ec</b>                       | <b>3ec:4ec</b>         |

The obtained vinylsilanes were identified by <sup>1</sup>H and <sup>13</sup>C{<sup>1</sup>H} NMR according to the published data for **3aa**,<sup>3</sup> **3ba**,<sup>3</sup> **3ab**,<sup>3</sup> **3bb**,<sup>3</sup> **3cb**,<sup>3</sup> **3db**,<sup>3</sup> **4ca**,<sup>3</sup> **4cb**,<sup>3</sup> **4da**,<sup>3</sup> **4db**,<sup>3</sup> **4ea**,<sup>3</sup> **4eb**,<sup>3</sup> **3ec**,<sup>4</sup> **4ec**,<sup>4</sup> **3ac**,<sup>5</sup> **3eb**,<sup>6</sup> **5db**.<sup>7</sup> All products were also checked by GC-MS (EI). Spectral data for **4bc** were not found in the literature, and the characterization is provided below.

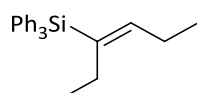

(E)-hex-3-en-3-yltriphenylsilane (**3bc**). Yield: 57 %.

<sup>1</sup>H NMR (300 MHz, CDCl<sub>3</sub>):  $\delta$  7.75 – 7.57 (m, 6H), 7.57 – 7.34 (m, 9H), 6.05 (t, J = 7.0 Hz, 1H), 2.35 (dt, J = 8.7, 7.5 Hz, 4H), 1.09 (t, J = 7.5 Hz, 3H), 0.84 (t, J = 7.5 Hz, 3H). <sup>13</sup>C{<sup>1</sup>H} NMR (75 MHz, CDCl<sub>3</sub>):  $\delta$  148.83, 136.45, 135.98, 135.06, 130.20, 129.30, 128.00, 127.72, 23.20, 22.22, 14.87, 14.14. GC-EI, m/z (relative intensity): 342 [M<sup>+</sup>, 261], 313(100), 264 (227), 260 (249), 259 (999), 235 (184), 183 (294), 181 (284), 180 (101), 105 (117).

## References

- 1 E. O. Pentsak and V. P. Ananikov, *Russ. Chem. Bull.*, 2014, **63**, 2560–2563.
- 2 C. G. Baumann, S. De Ornellas, J. P. Reeds, T. E. Storr, T. J. Williams and I. J. S. Fairlamb, *Tetrahedron*, 2014, **70**, 6174–6187.
- 3 M. Chauhan, B. J. Hauck, L. P. Keller and P. Boudjouk, *J. Organomet. Chem.*, 2002, **645**, 1–13.
- 4 J. Fotie, M. Enechojo Agbo, F. Qu and T. Tolar, *Tetrahedron Lett.*, 2020, **61**, 152300.
- 5 A. Rivera-Hernández, B. J. Fallon, S. Ventre, C. Simon, M.-H. Tremblay, G. Gontard, E. Derat, M. Amatore, C. Aubert and M. Petit, *Org. Lett.*, 2016, **18**, 4242–4245.
- 6 X. Zhang, X. Ji, X. Xie and S. Ding, *Chem. Commun.*, 2018, **54**, 12958–12961.
- 7 X. Zhao, D. Yang, Y. Zhang, B. Wang and J. Qu, *Org. Lett.*, 2018, **20**, 5357–5361.
